# Supplementary material
Source: ML conference proceedings conference paper supplement (https://openreview.net/forum?id=DAYsM4zDNg)

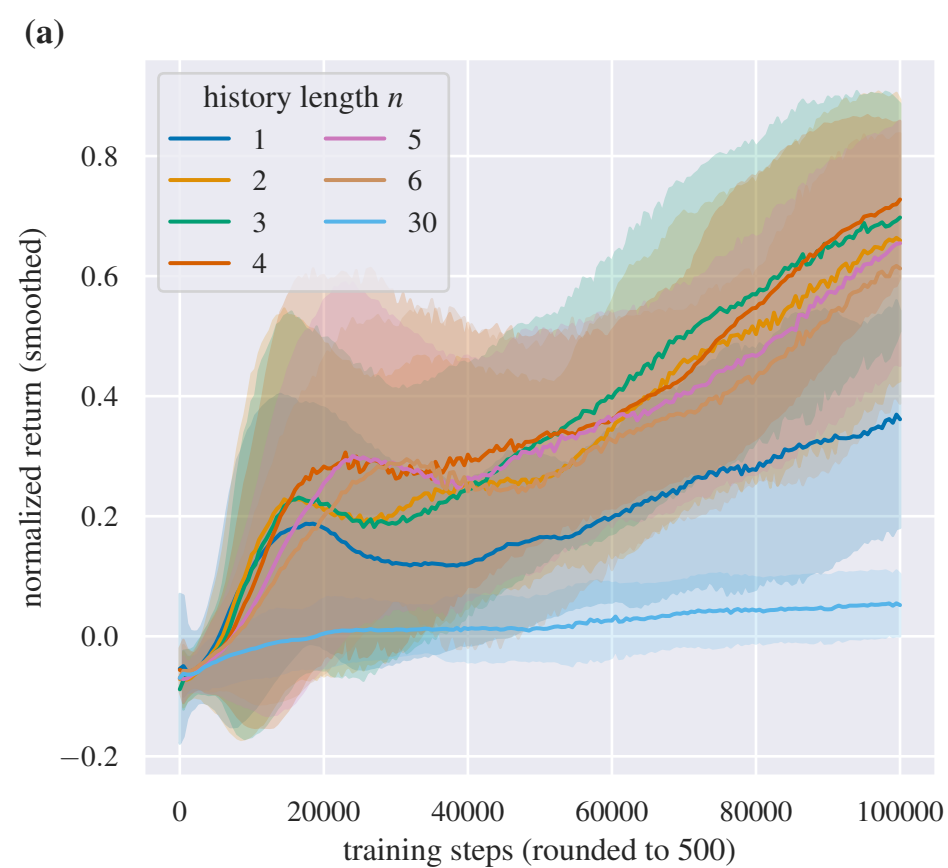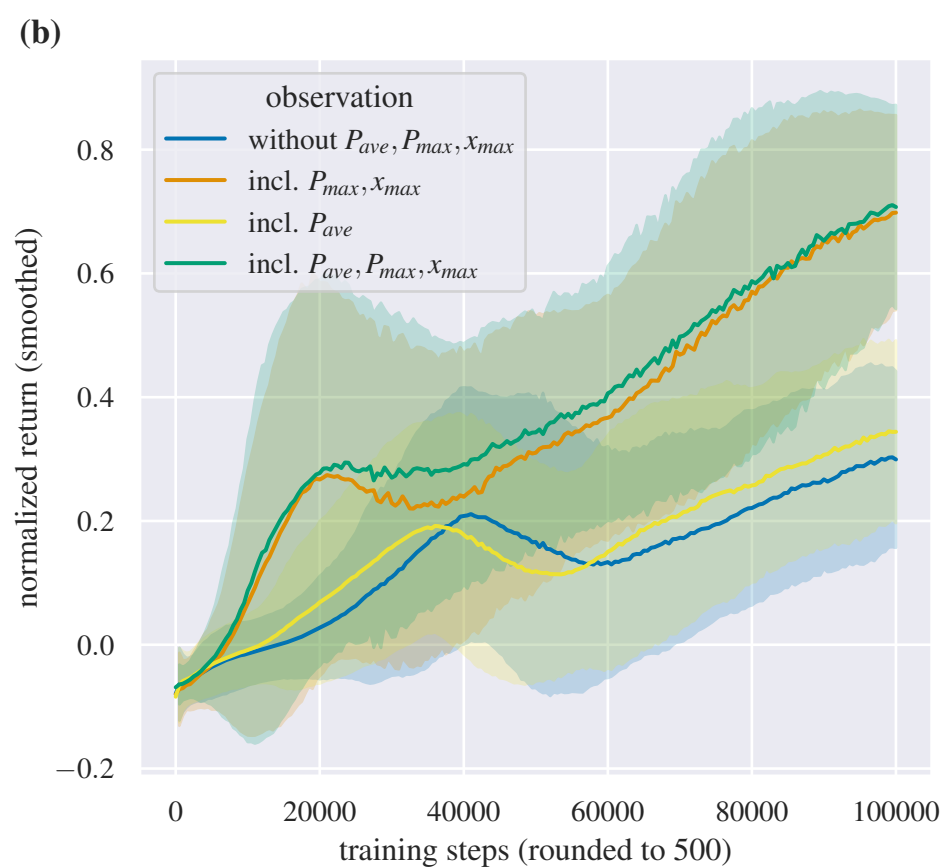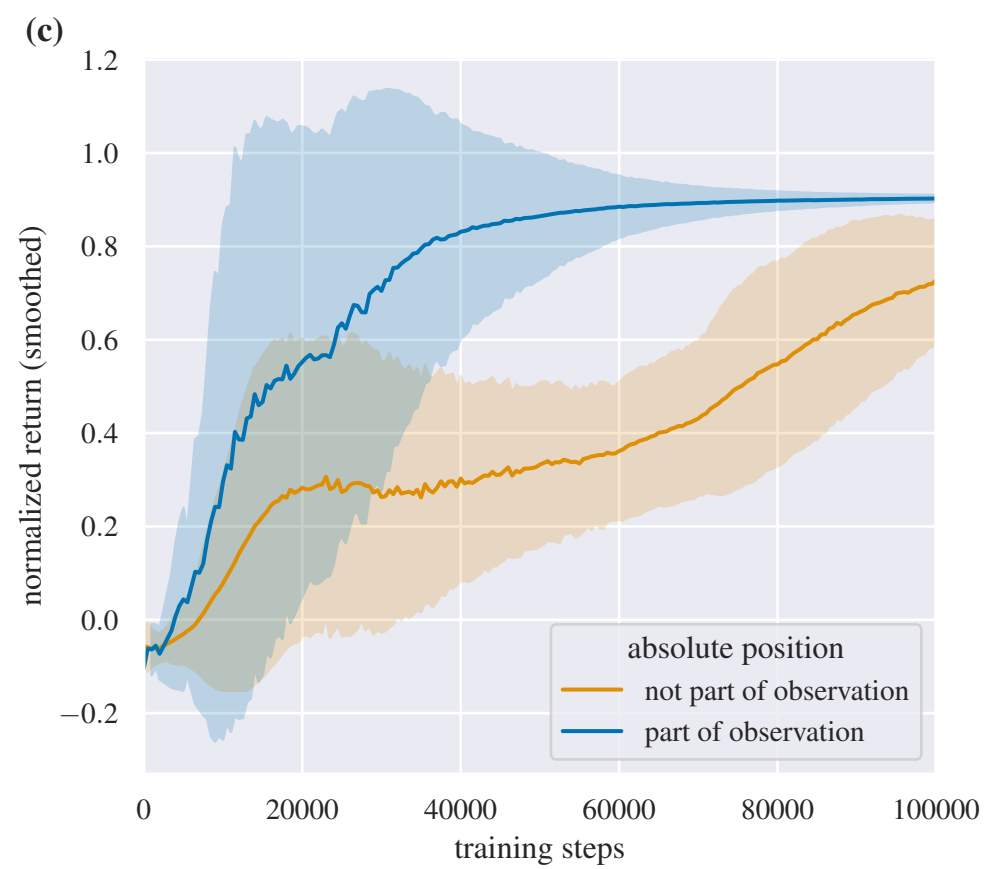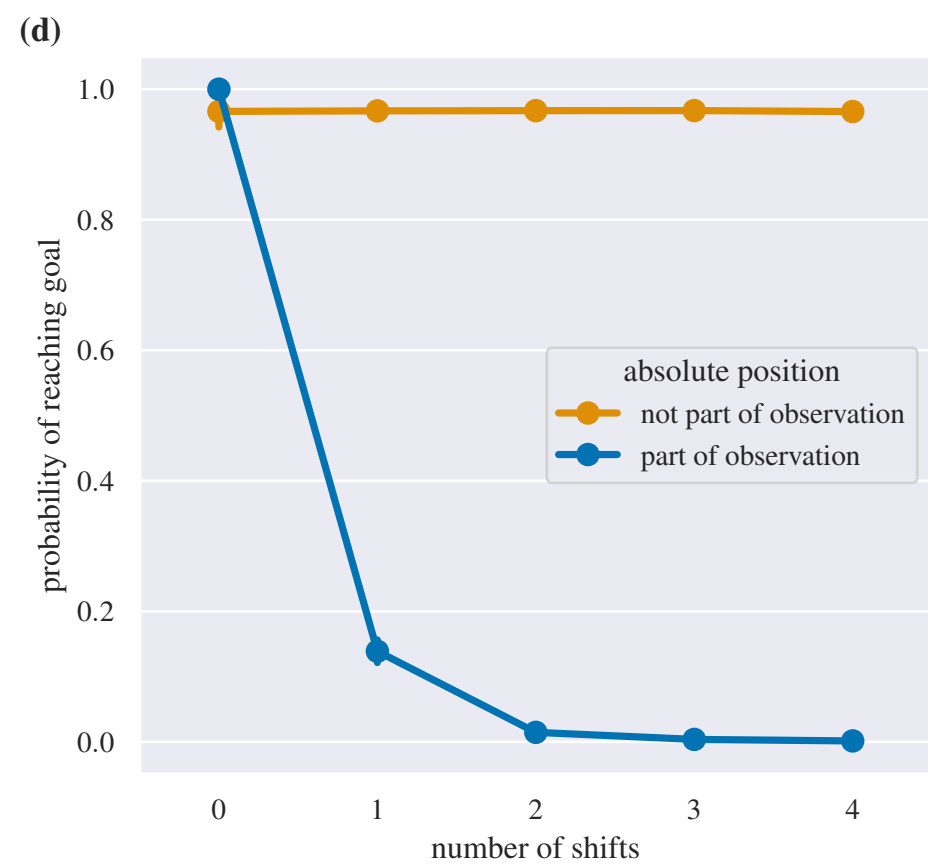

Supplement: supplementary_material [file attachment]

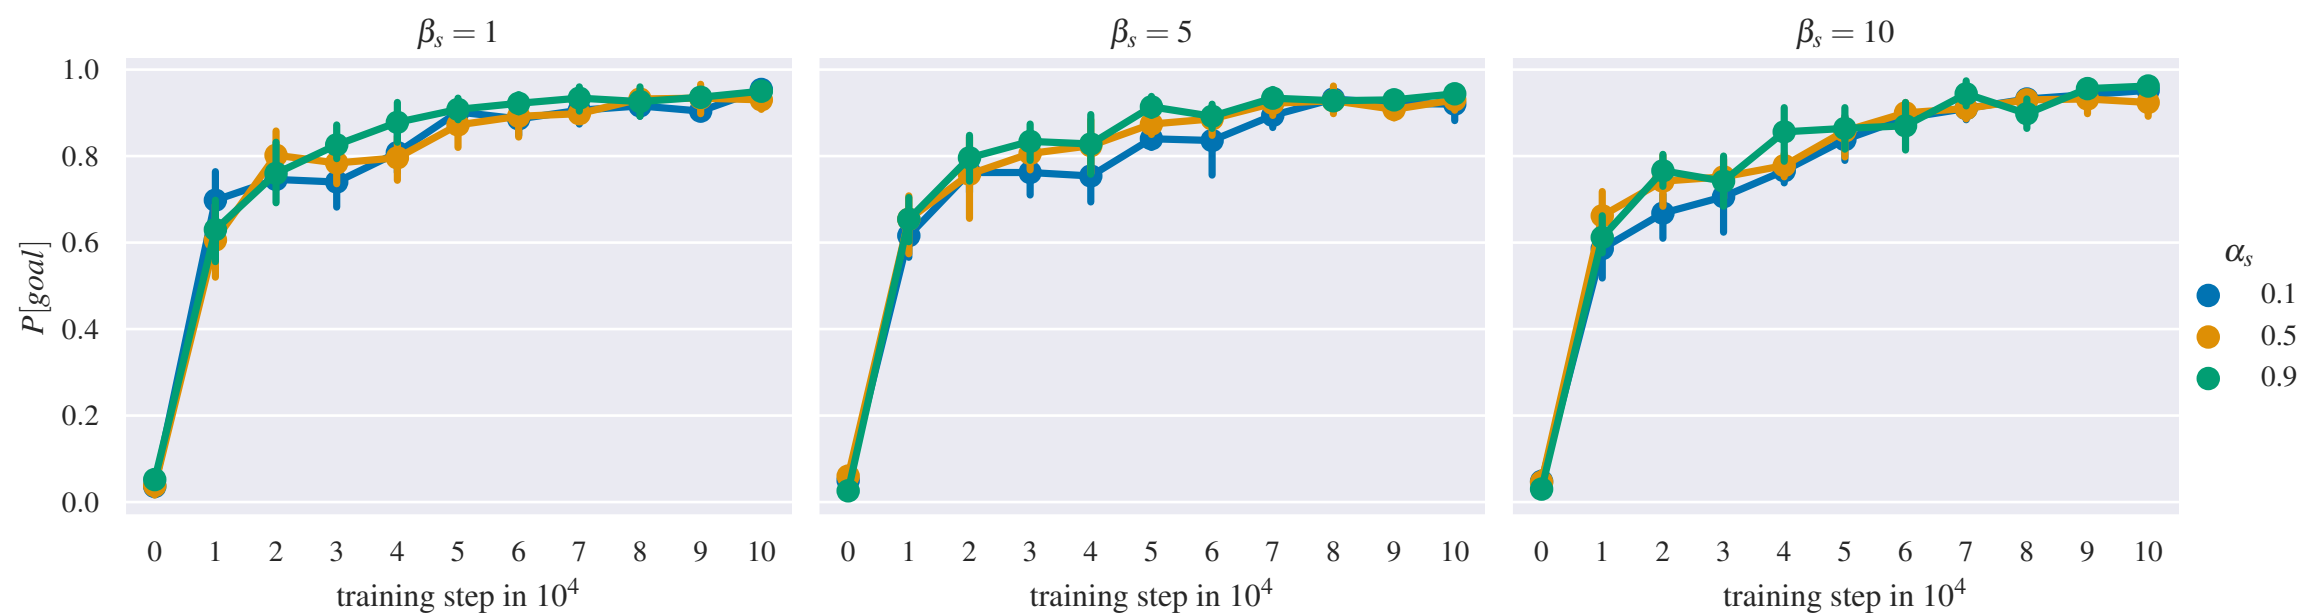

Supplement: supplementary_material [file attachment]

(a)

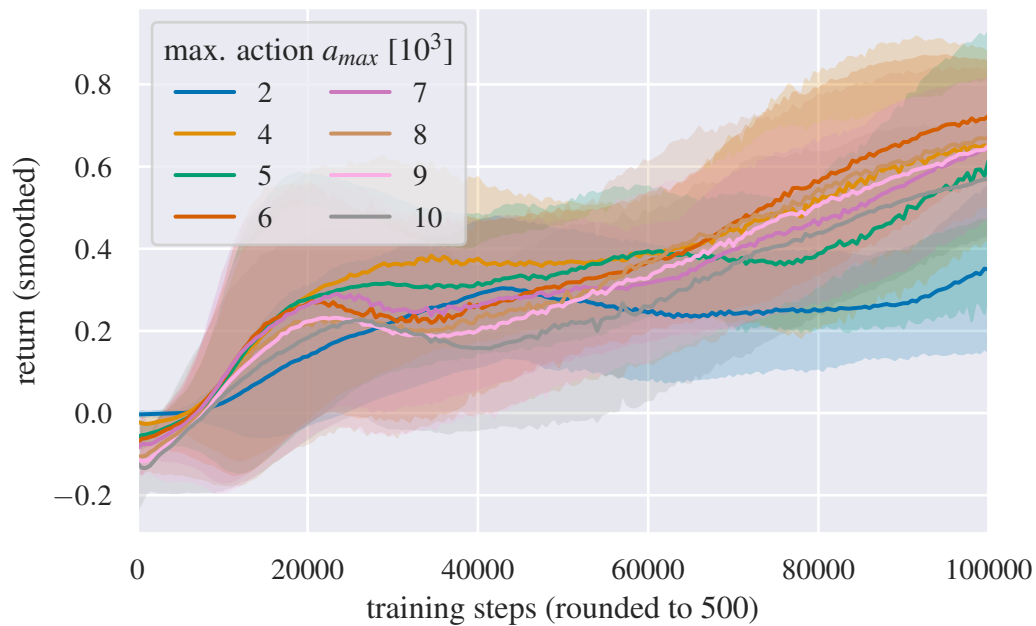

(b)

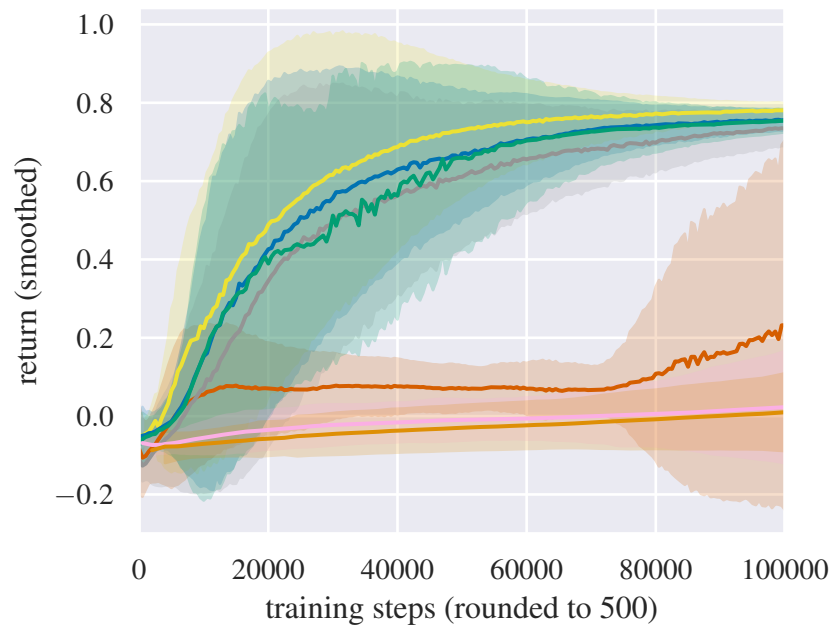

(c)

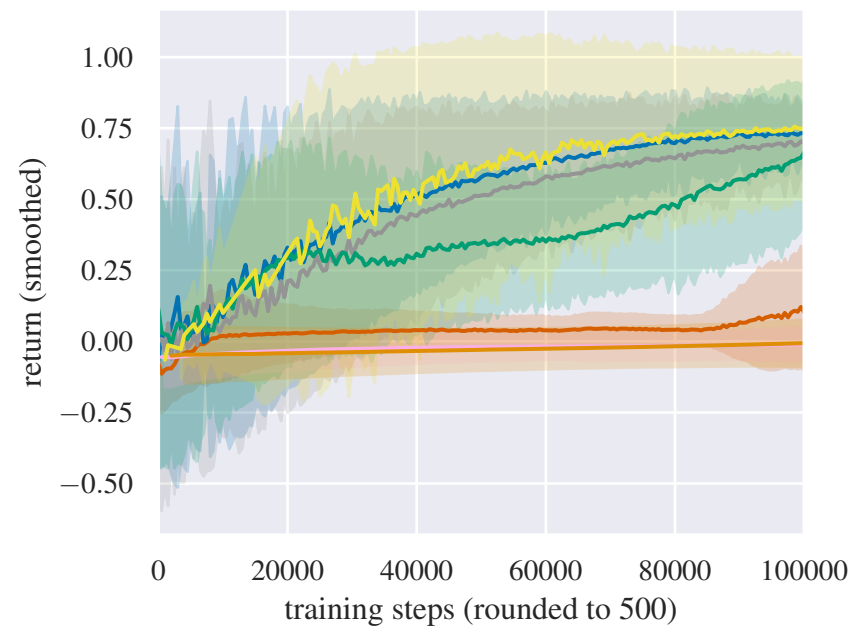

(d)

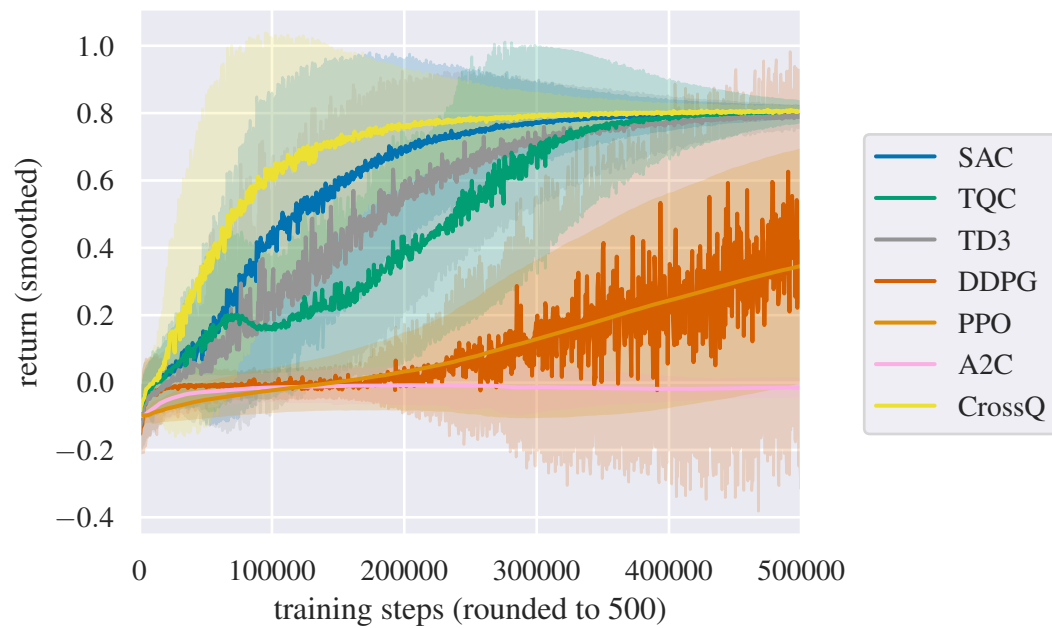

Supplement: supplementary_material [file attachment]

**(a)**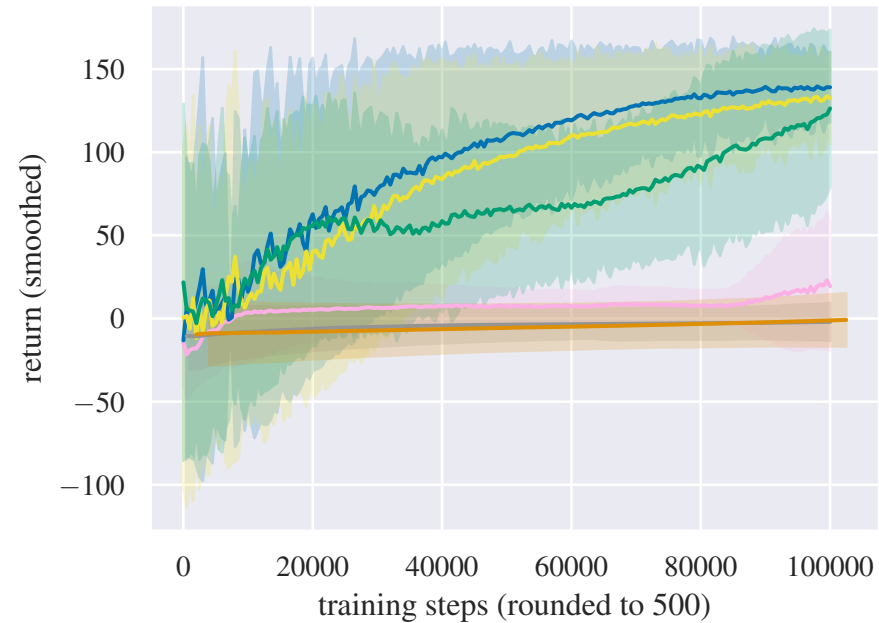**(b)**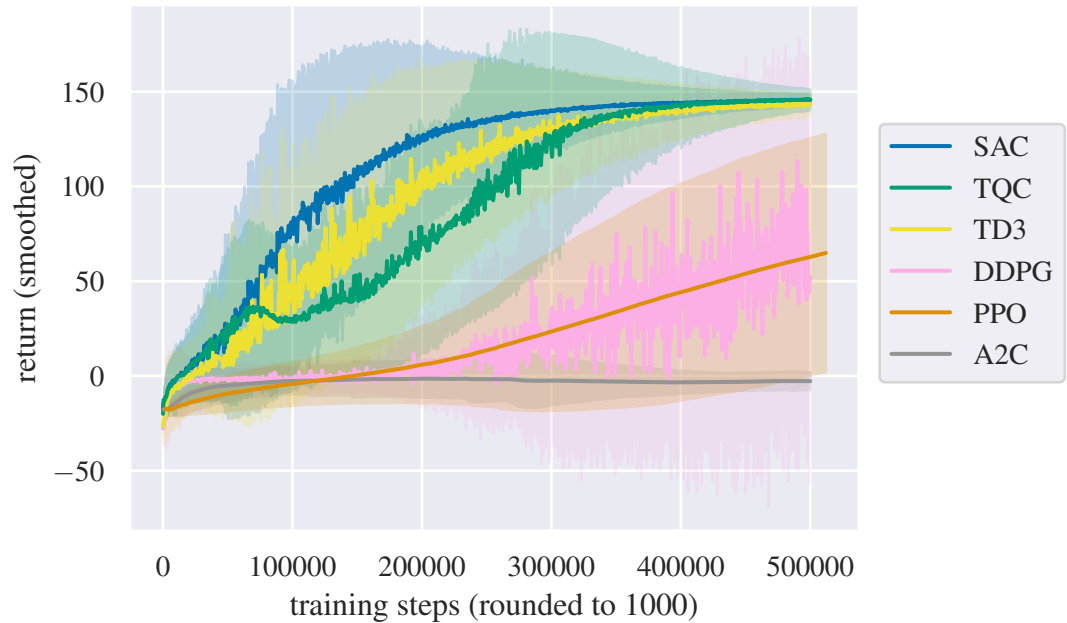

Supplement: supplementary_material [file attachment]

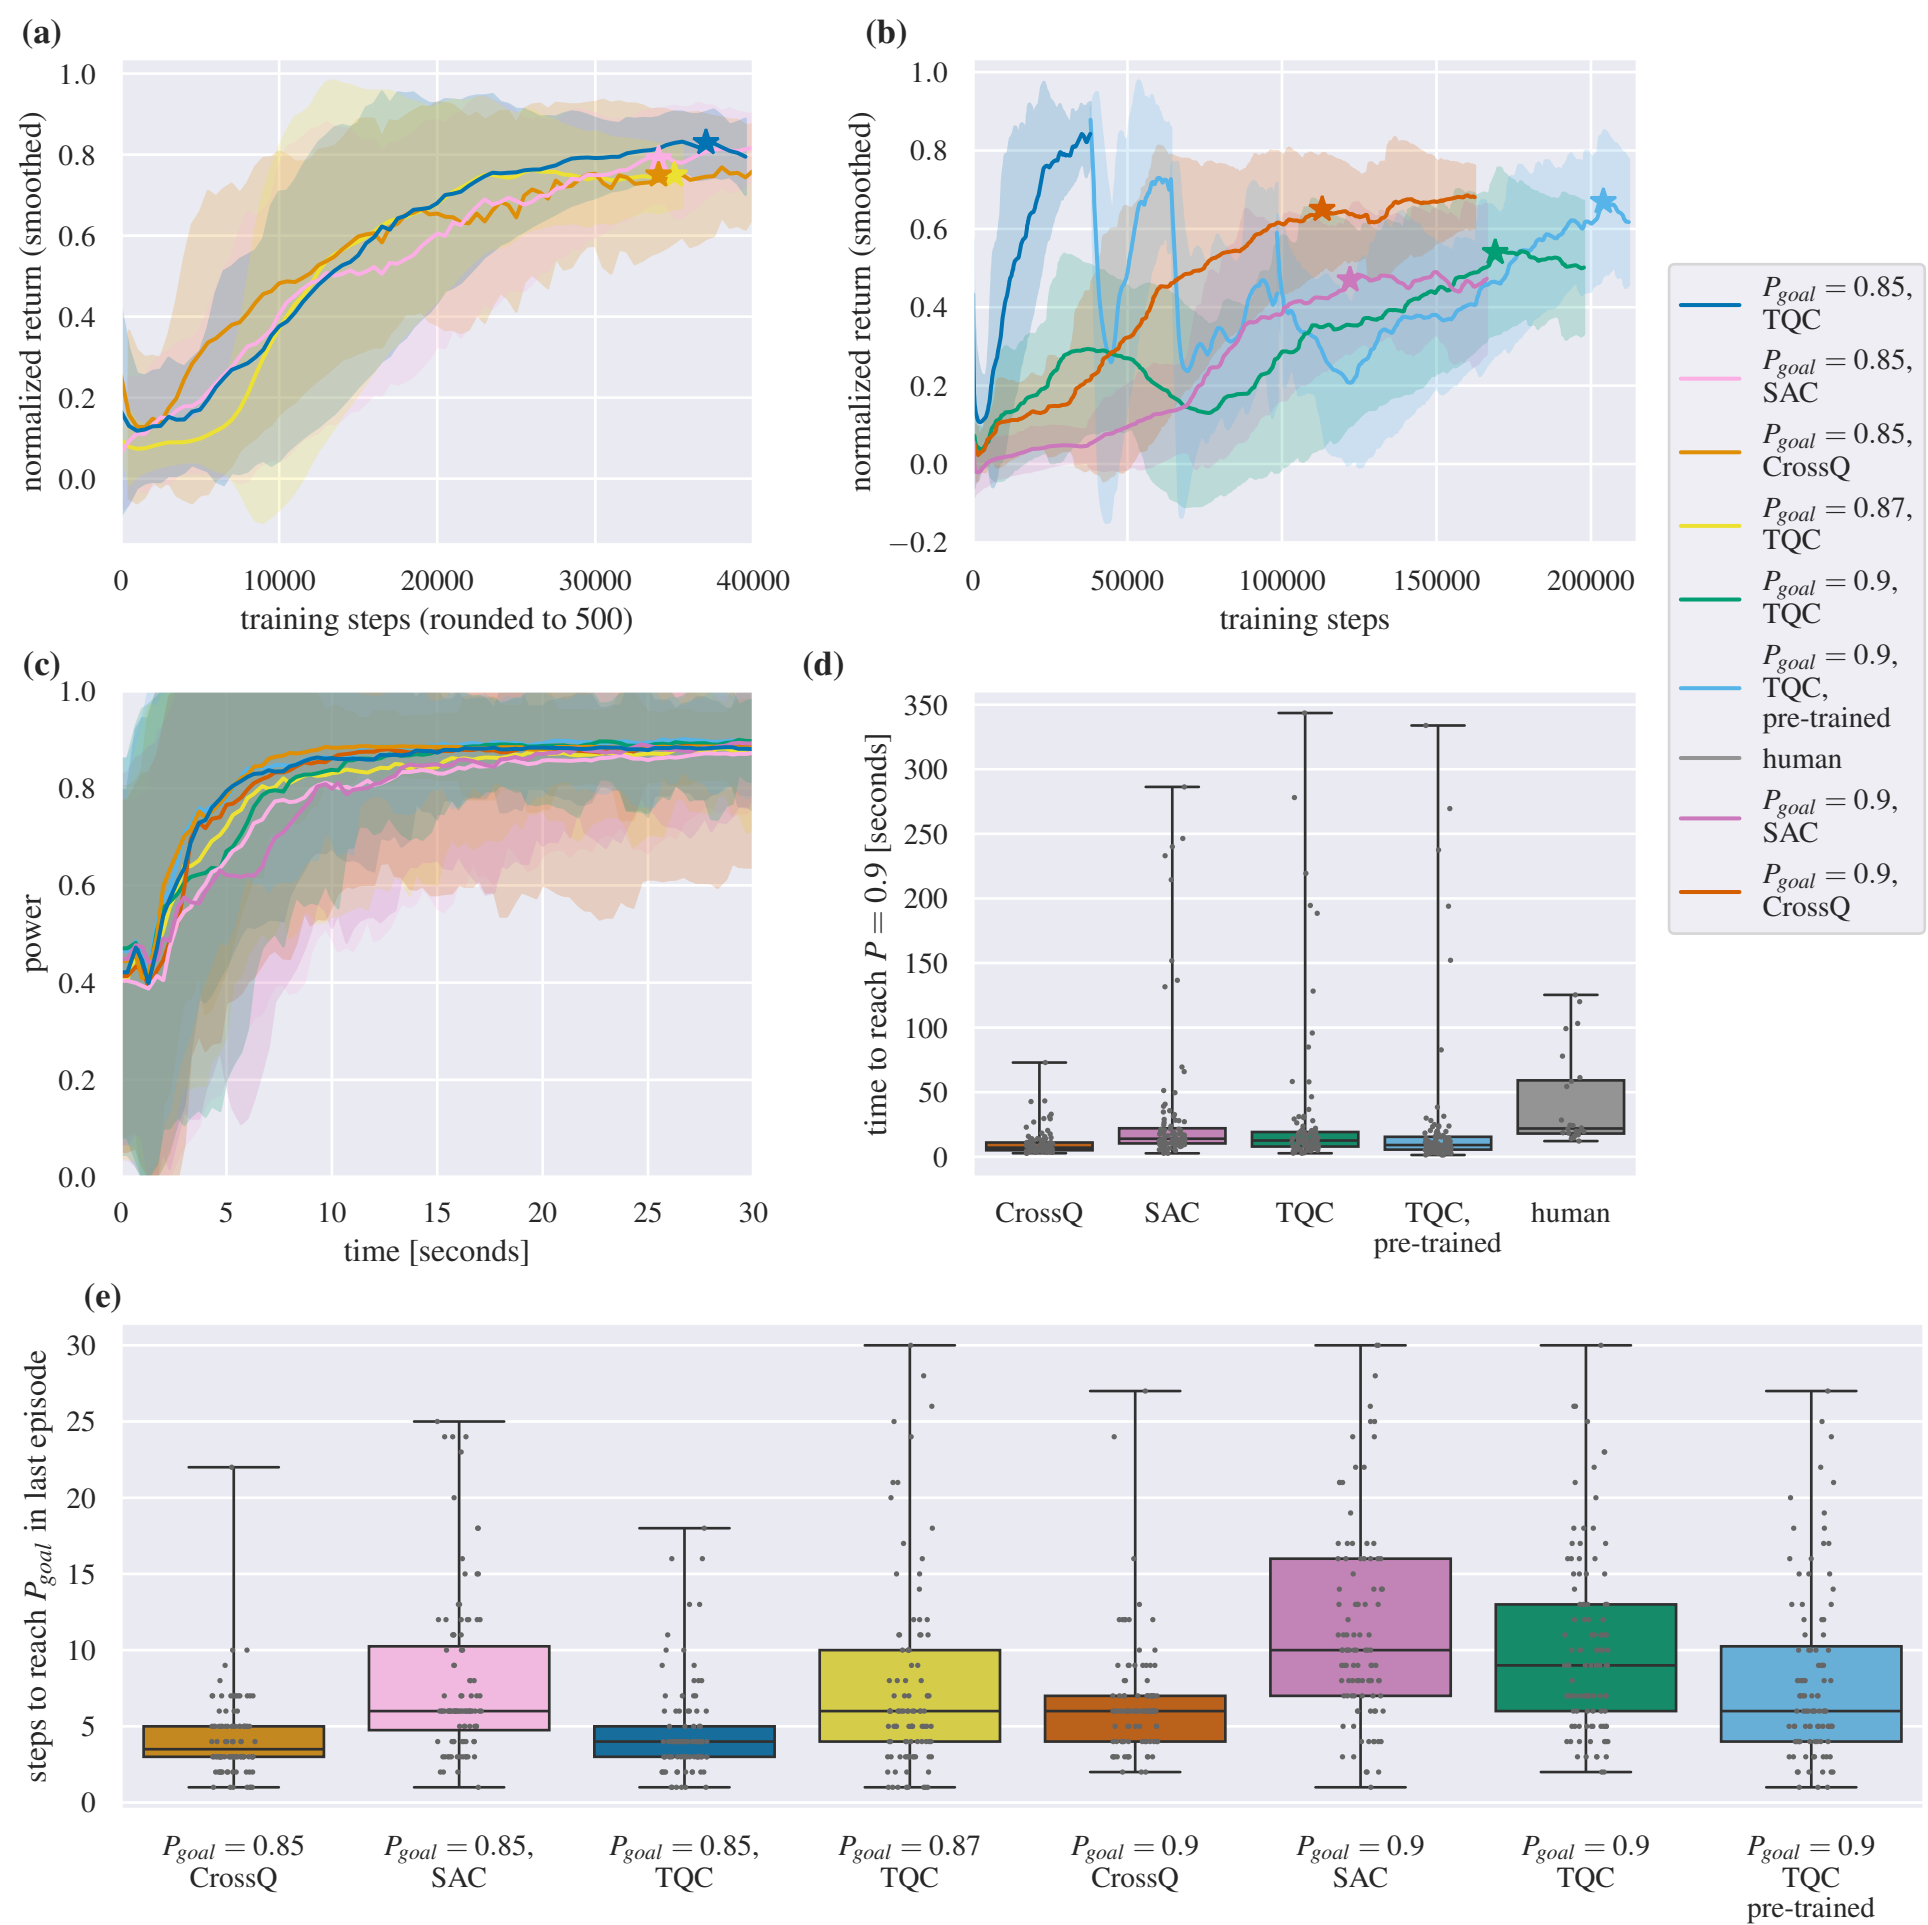

Supplement: supplementary_material [file attachment]

**(a)****(b)****(c)****(d)**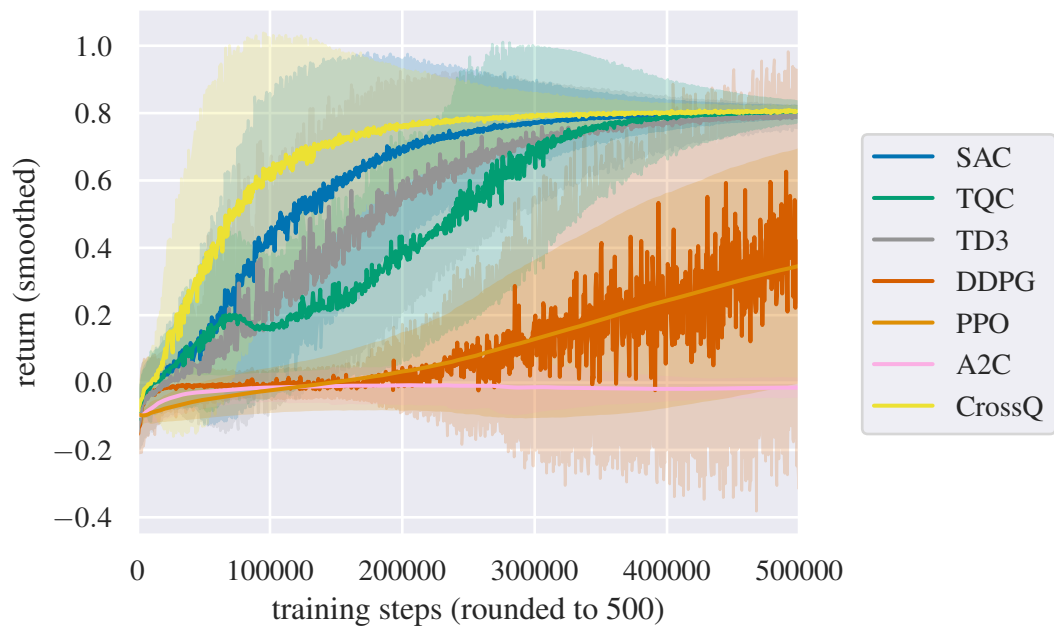

Supplement: supplementary_material [file attachment]

(a)

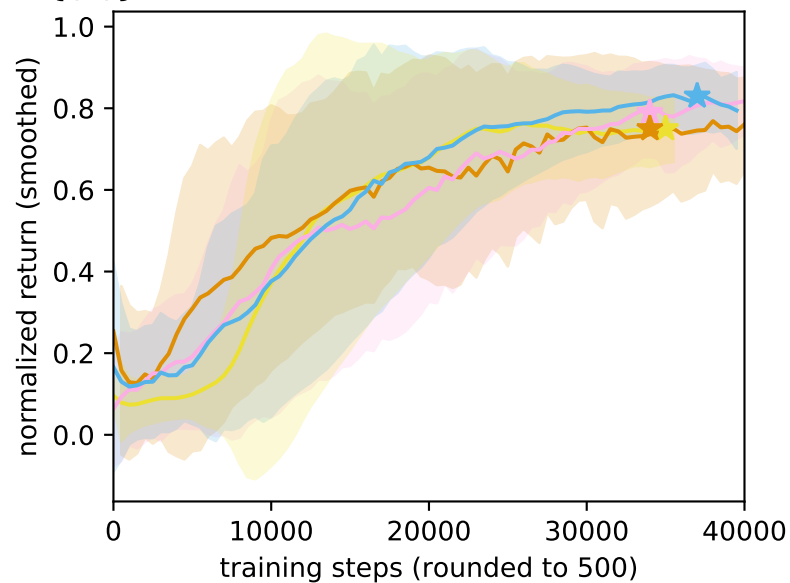

(b)

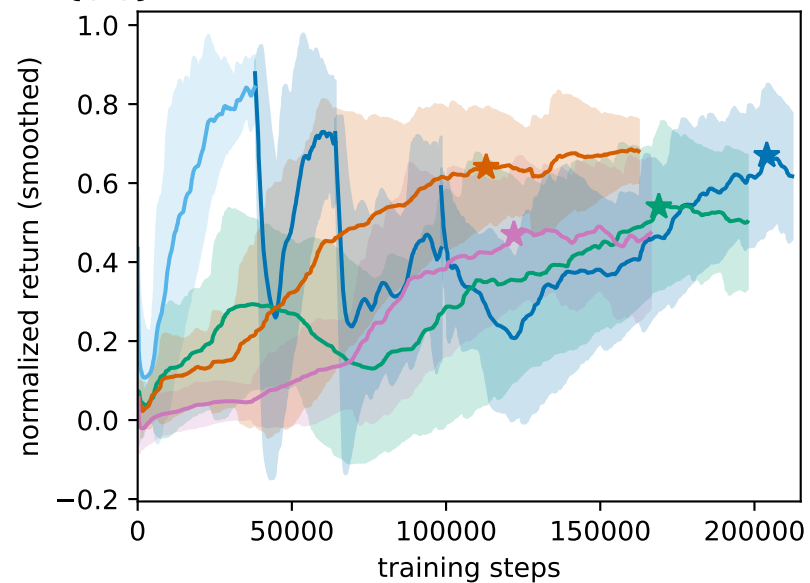

(c)

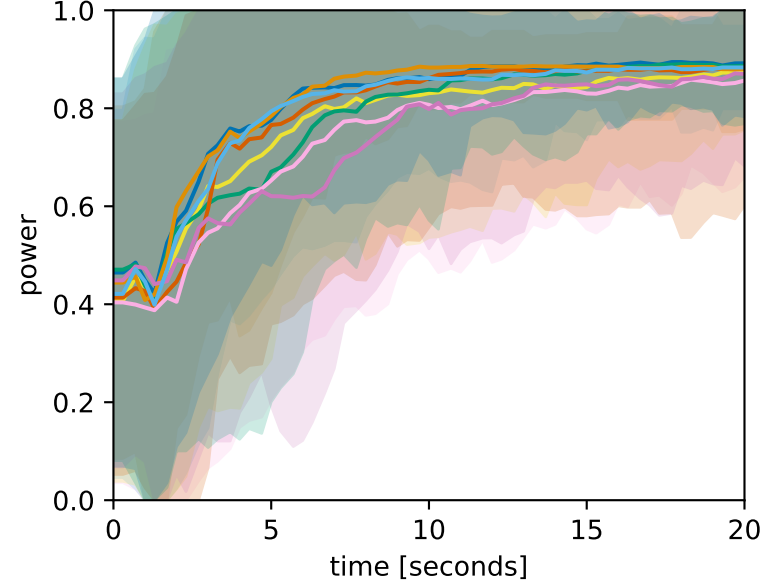

(d)

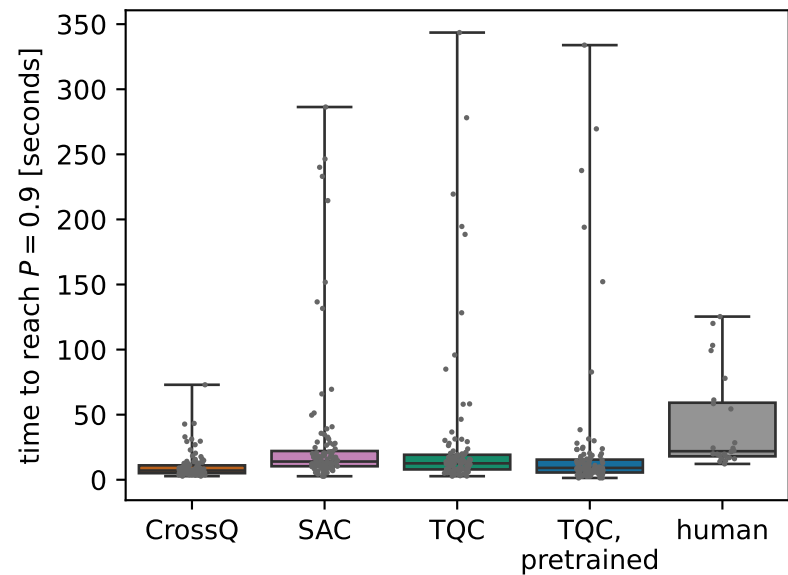

(e)

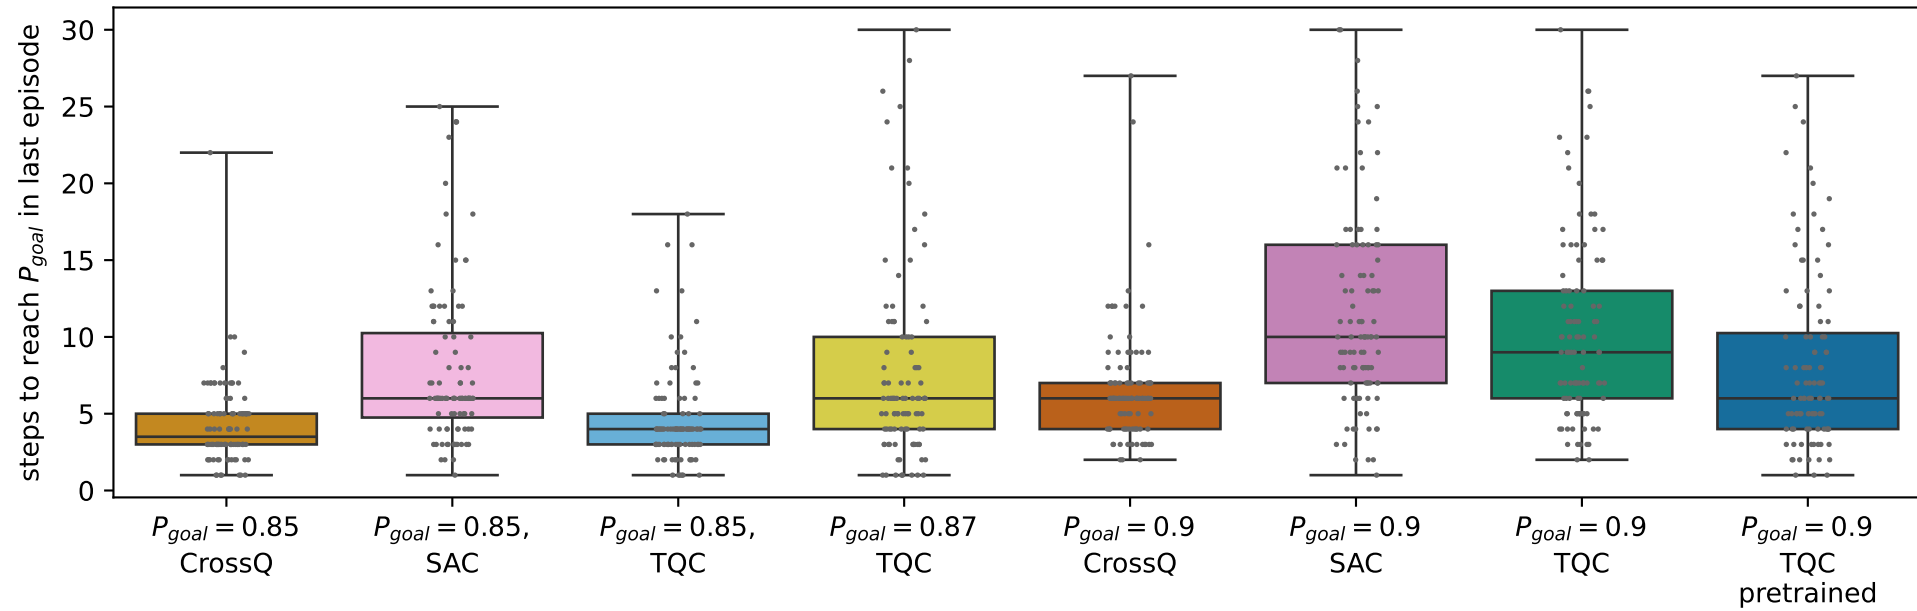

Supplement: supplementary_material [file attachment]

(a)

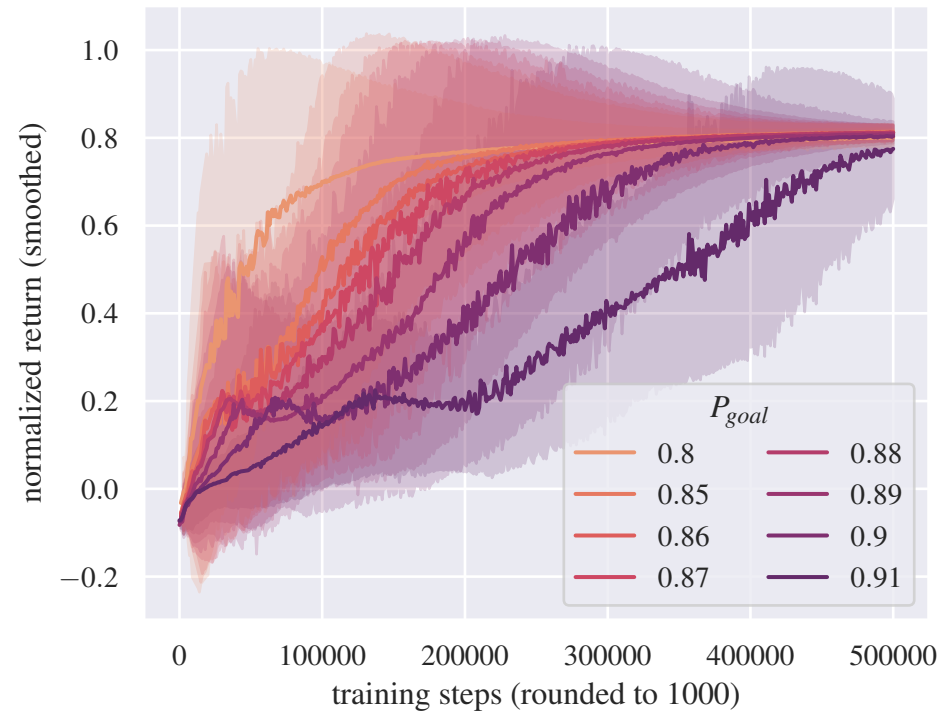

(b)

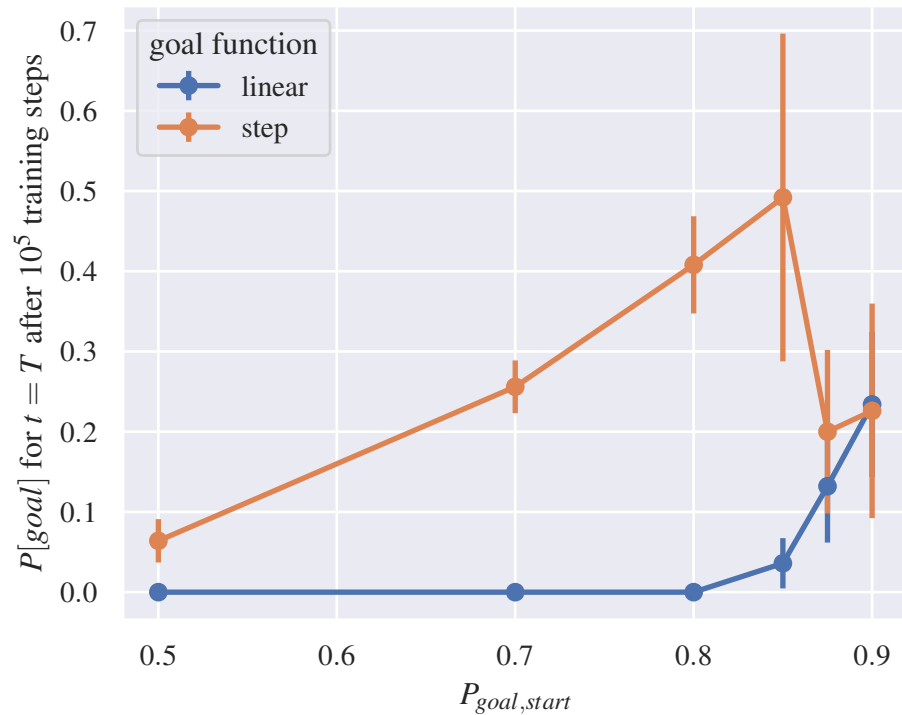

Supplement: supplementary_material [file attachment]

**(a)**

normalized return (smoothed)

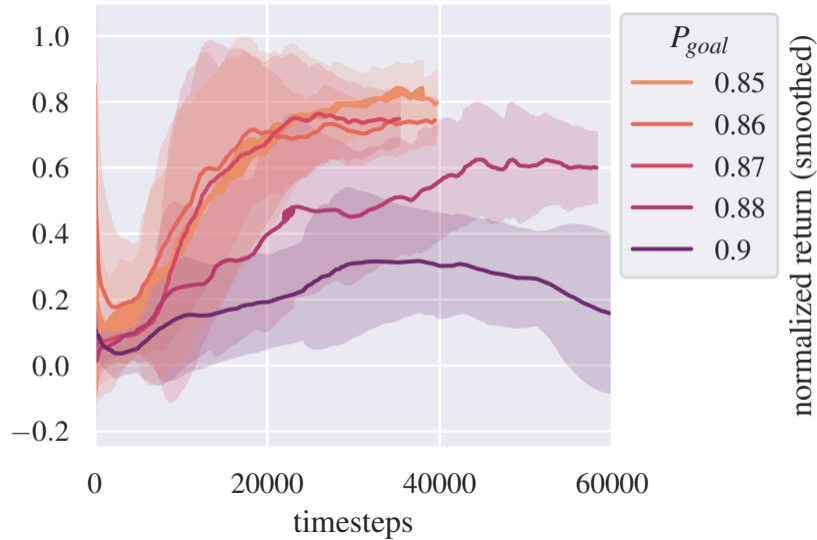**(b)**

normalized return (smoothed)

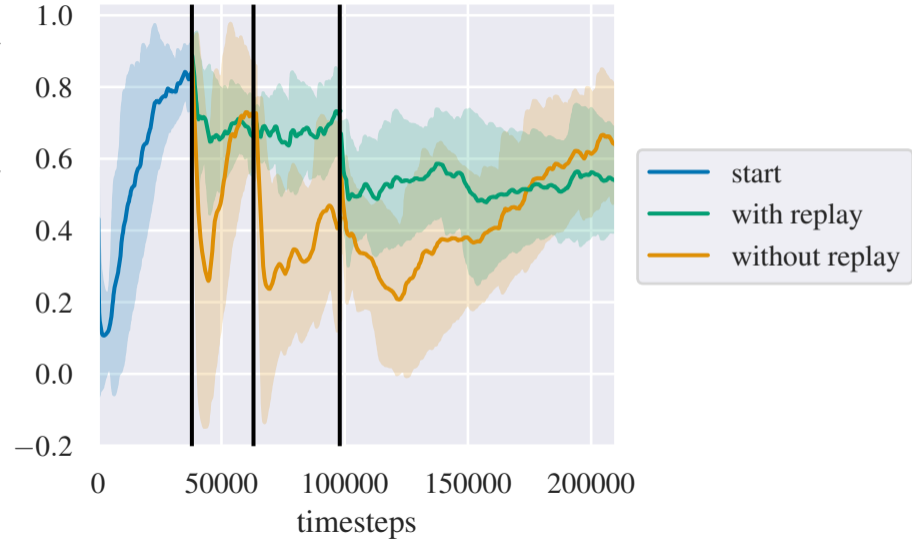

Supplement: supplementary_material [file attachment]

$$\beta_{g1} = 1, \beta_{g2} = 1$$

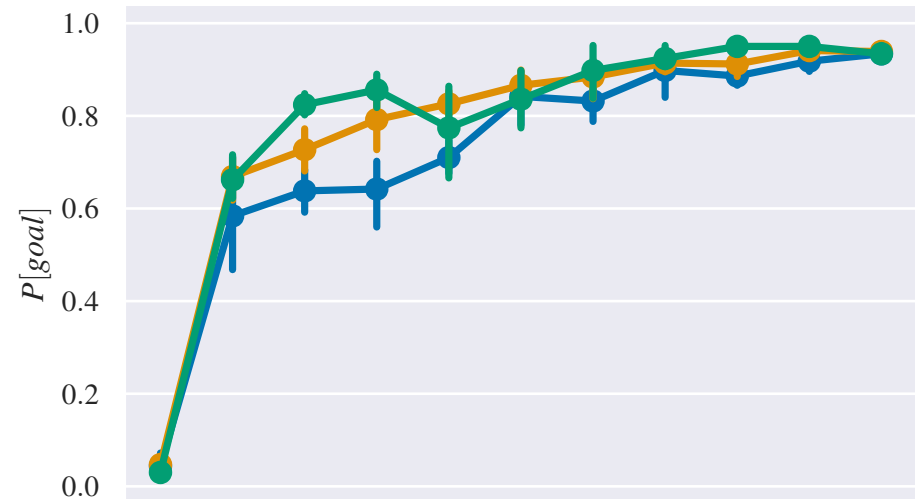

$$\beta_{g1} = 5, \beta_{g2} = 1$$

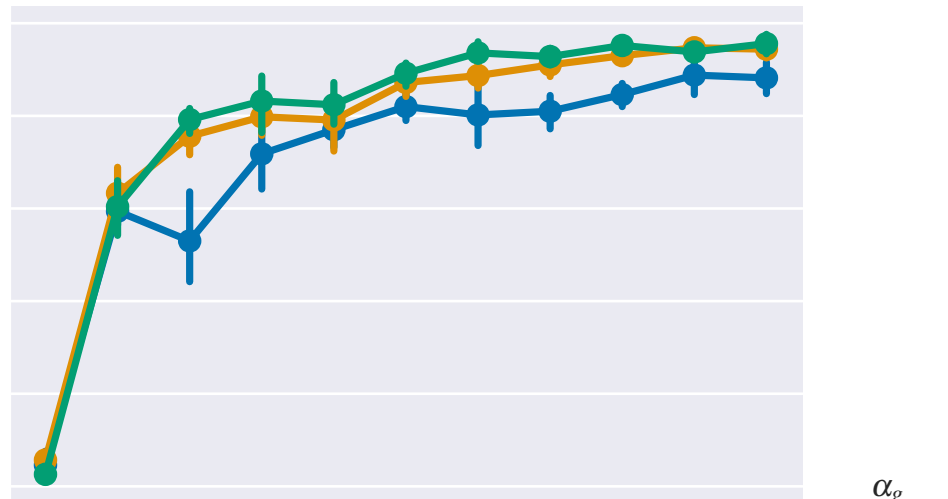

$$\beta_{g1} = 1, \beta_{g2} = 5$$

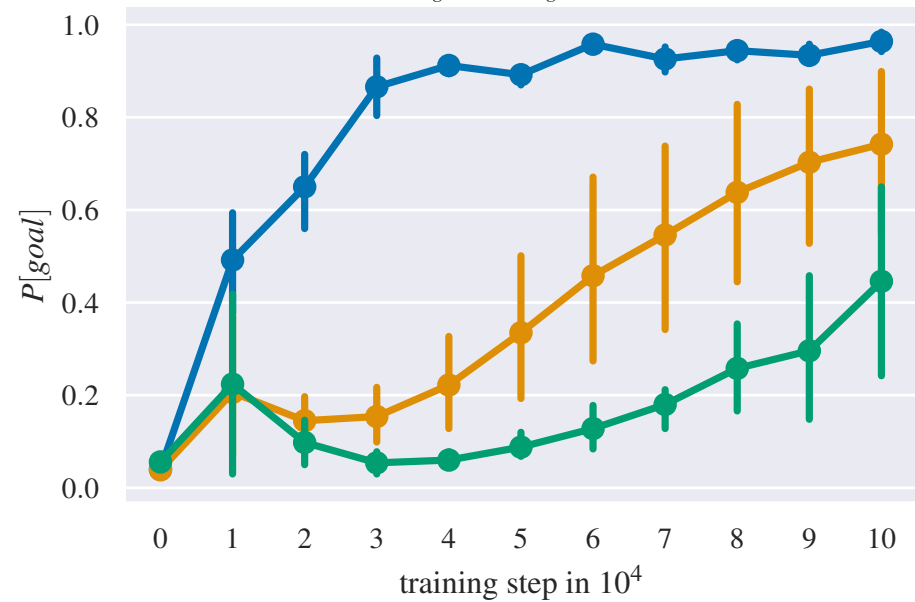

$$\beta_{g1} = 5, \beta_{g2} = 5$$

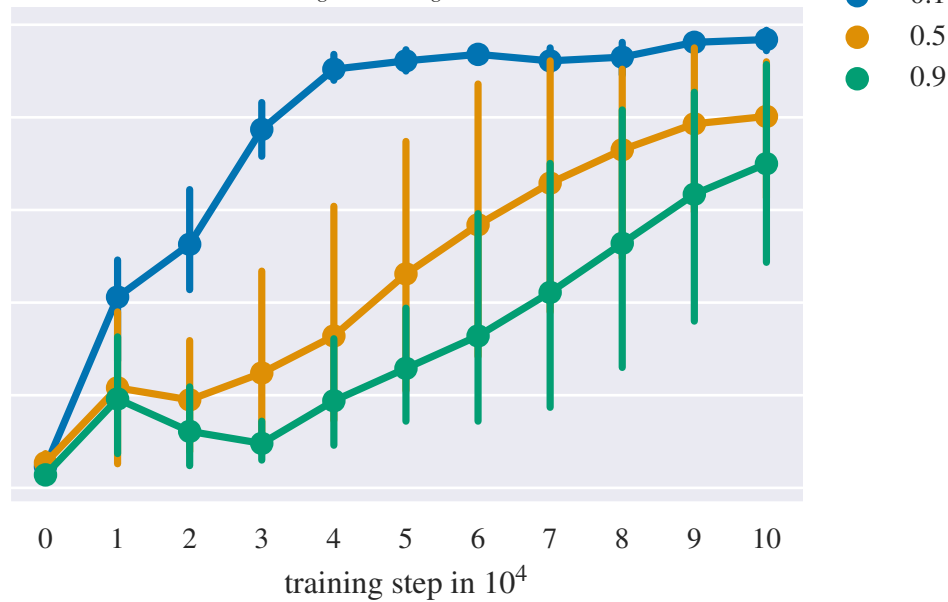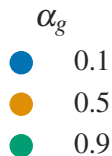

Supplement: supplementary_material [file attachment]

$\beta_{f1} = 1, \beta_{f2} = 1$ 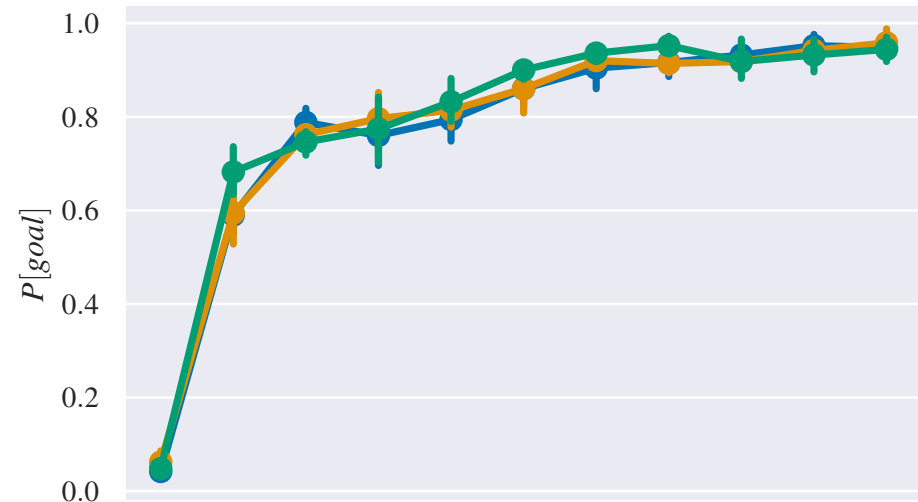 $\beta_{f1} = 5, \beta_{f2} = 1$ 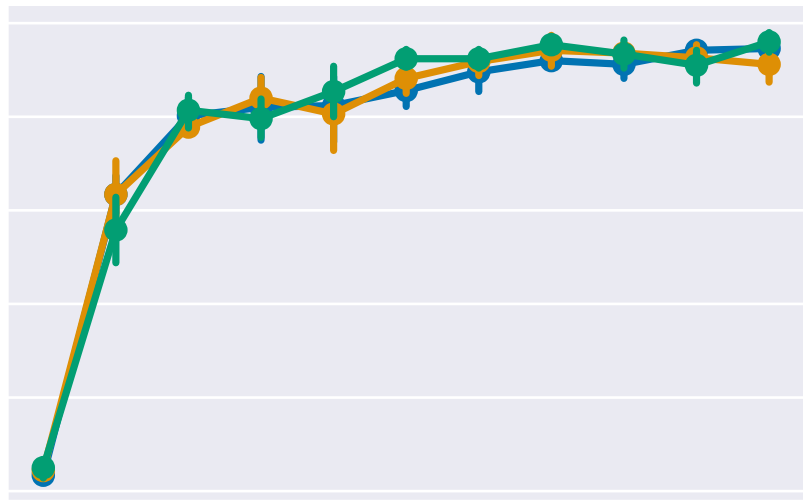 $\beta_{f1} = 1, \beta_{f2} = 5$ 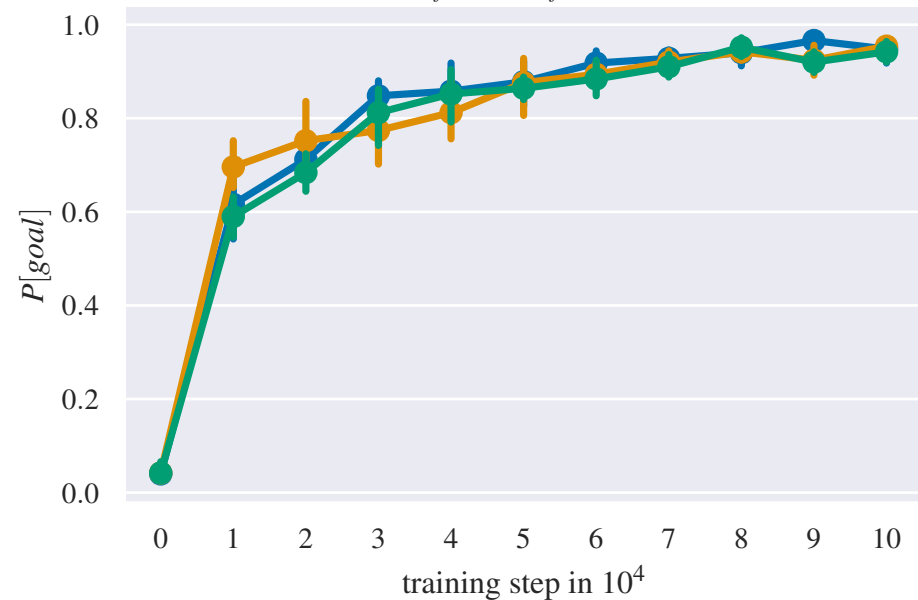 $\beta_{f1} = 5, \beta_{f2} = 5$ 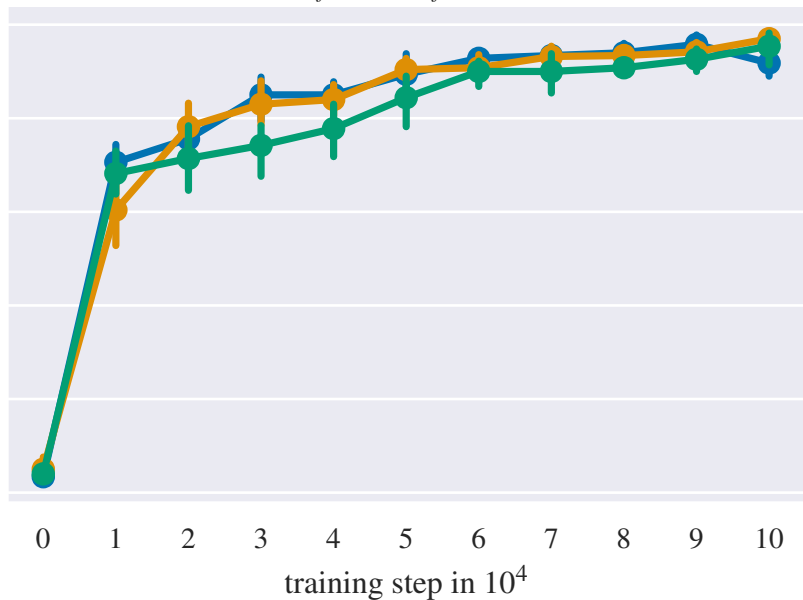

$\alpha_f$

- 0.1
- 0.5
- 0.9

Supplement: supplementary_material [file attachment]

**(a)**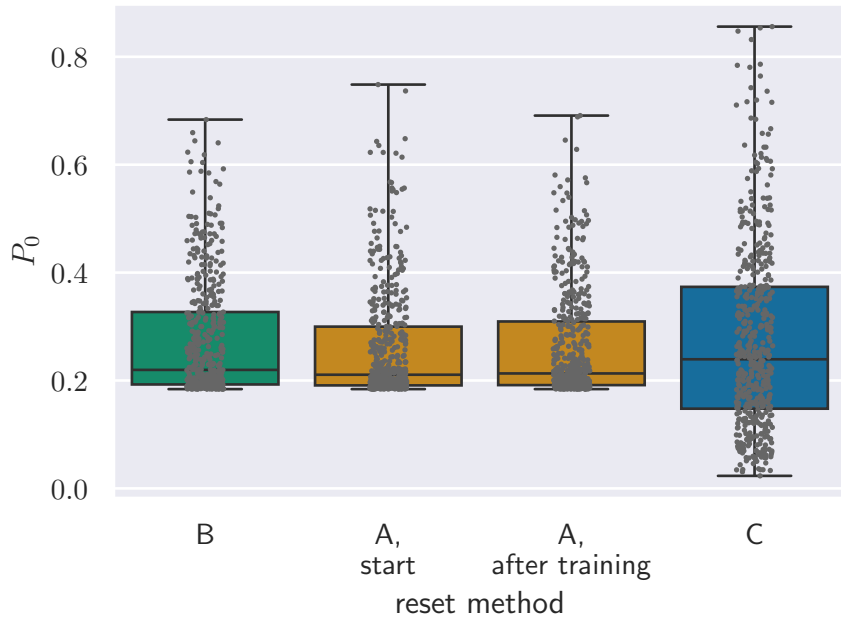**(b)**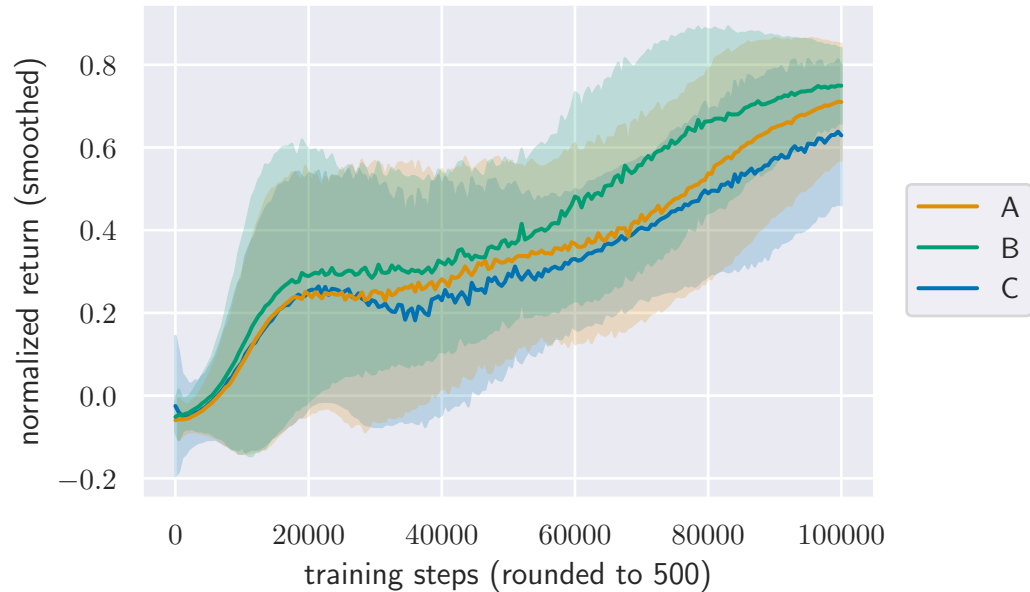

Supplement: supplementary_material [file attachment]

**(a)**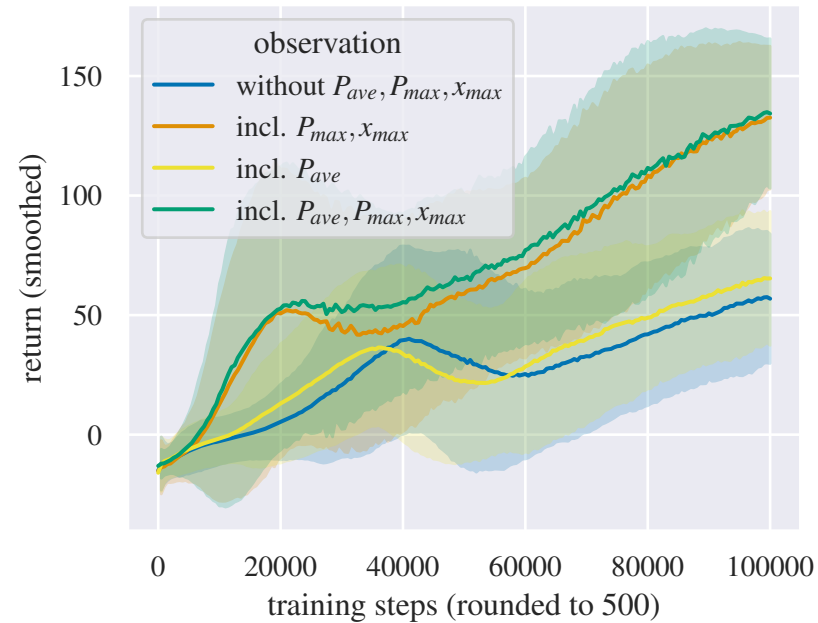**(b)**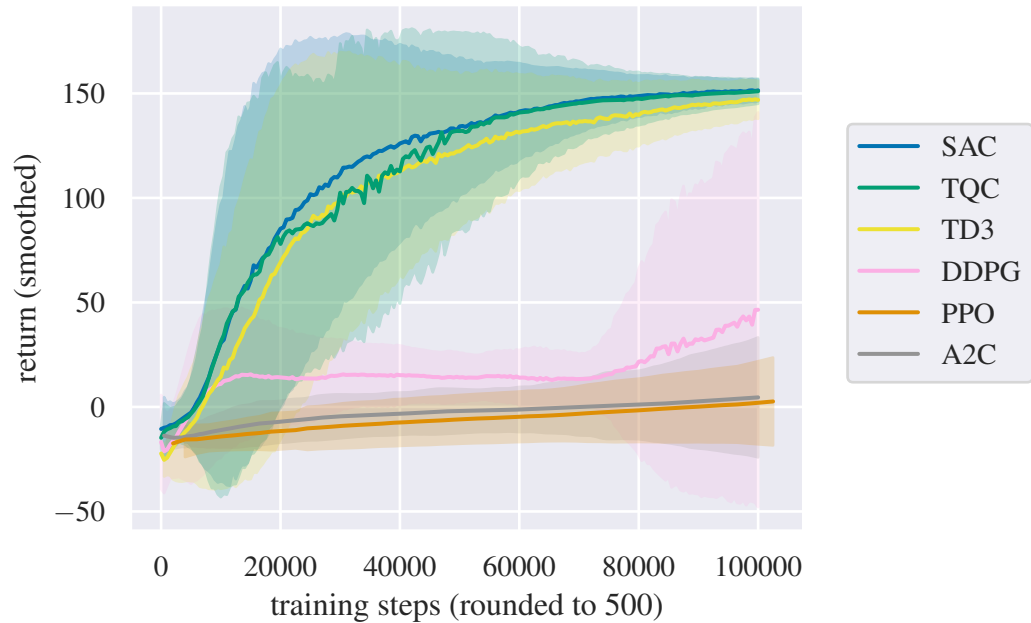

Supplement: supplementary_material [file attachment]

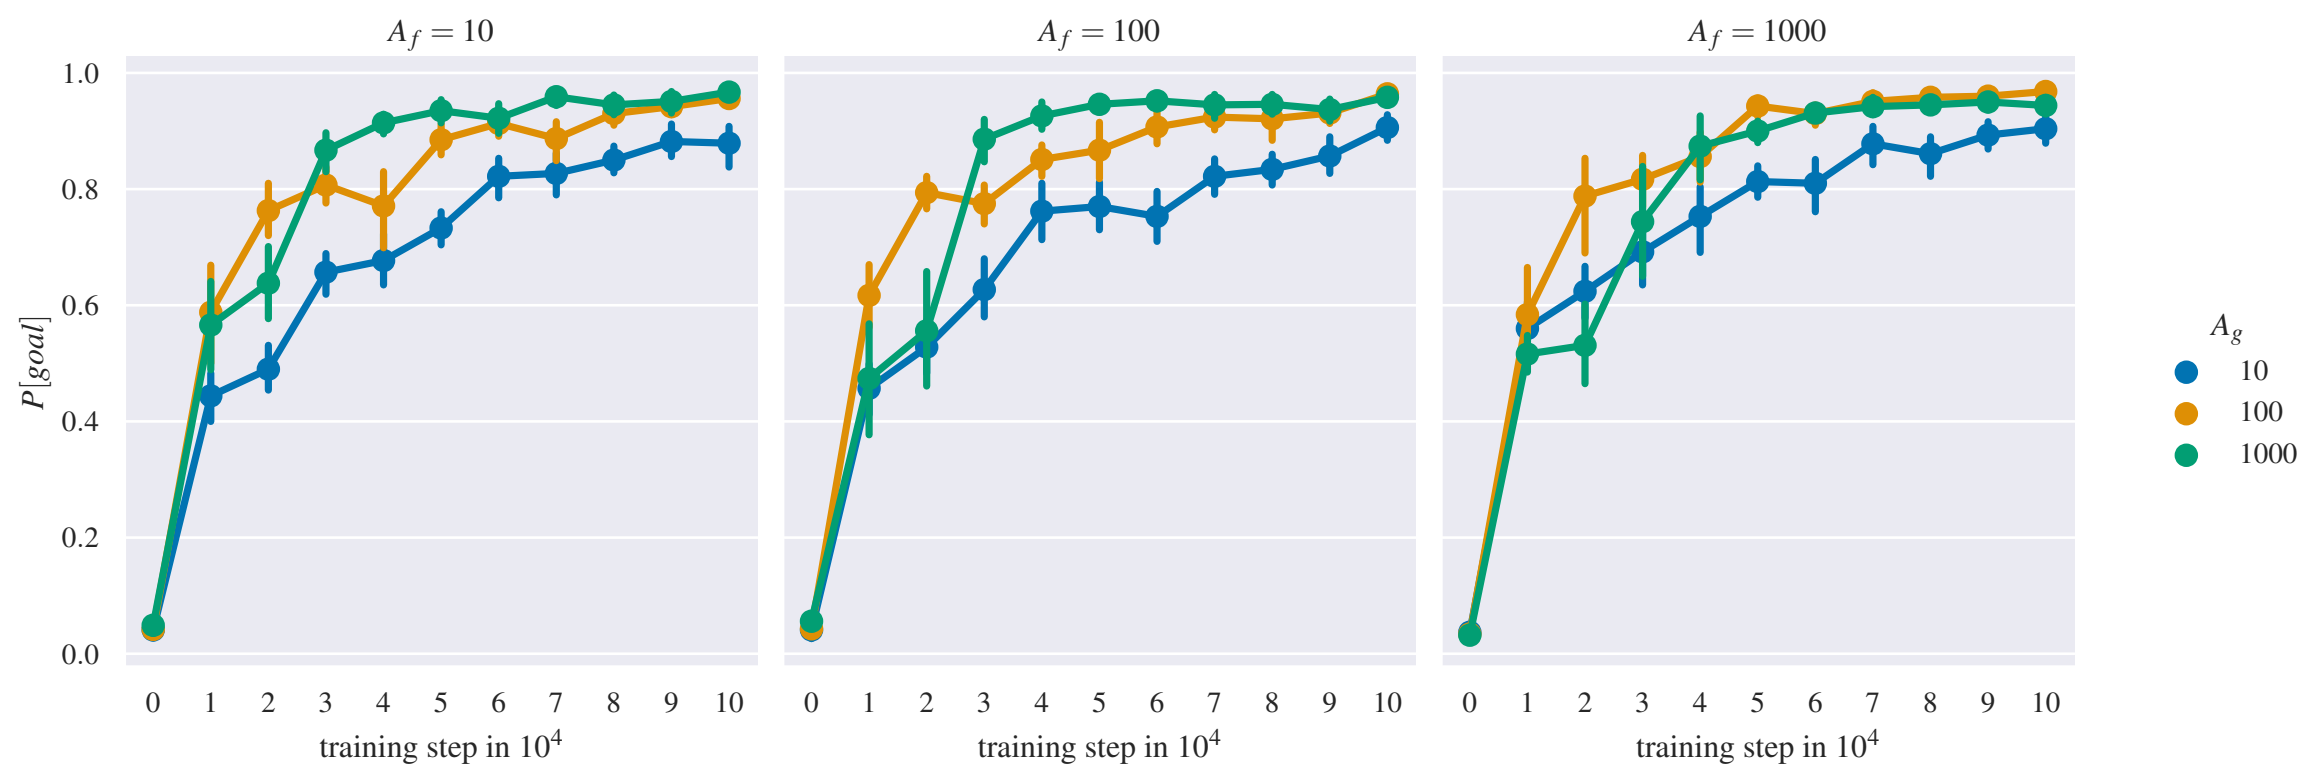

Supplement: supplementary_material [file attachment]

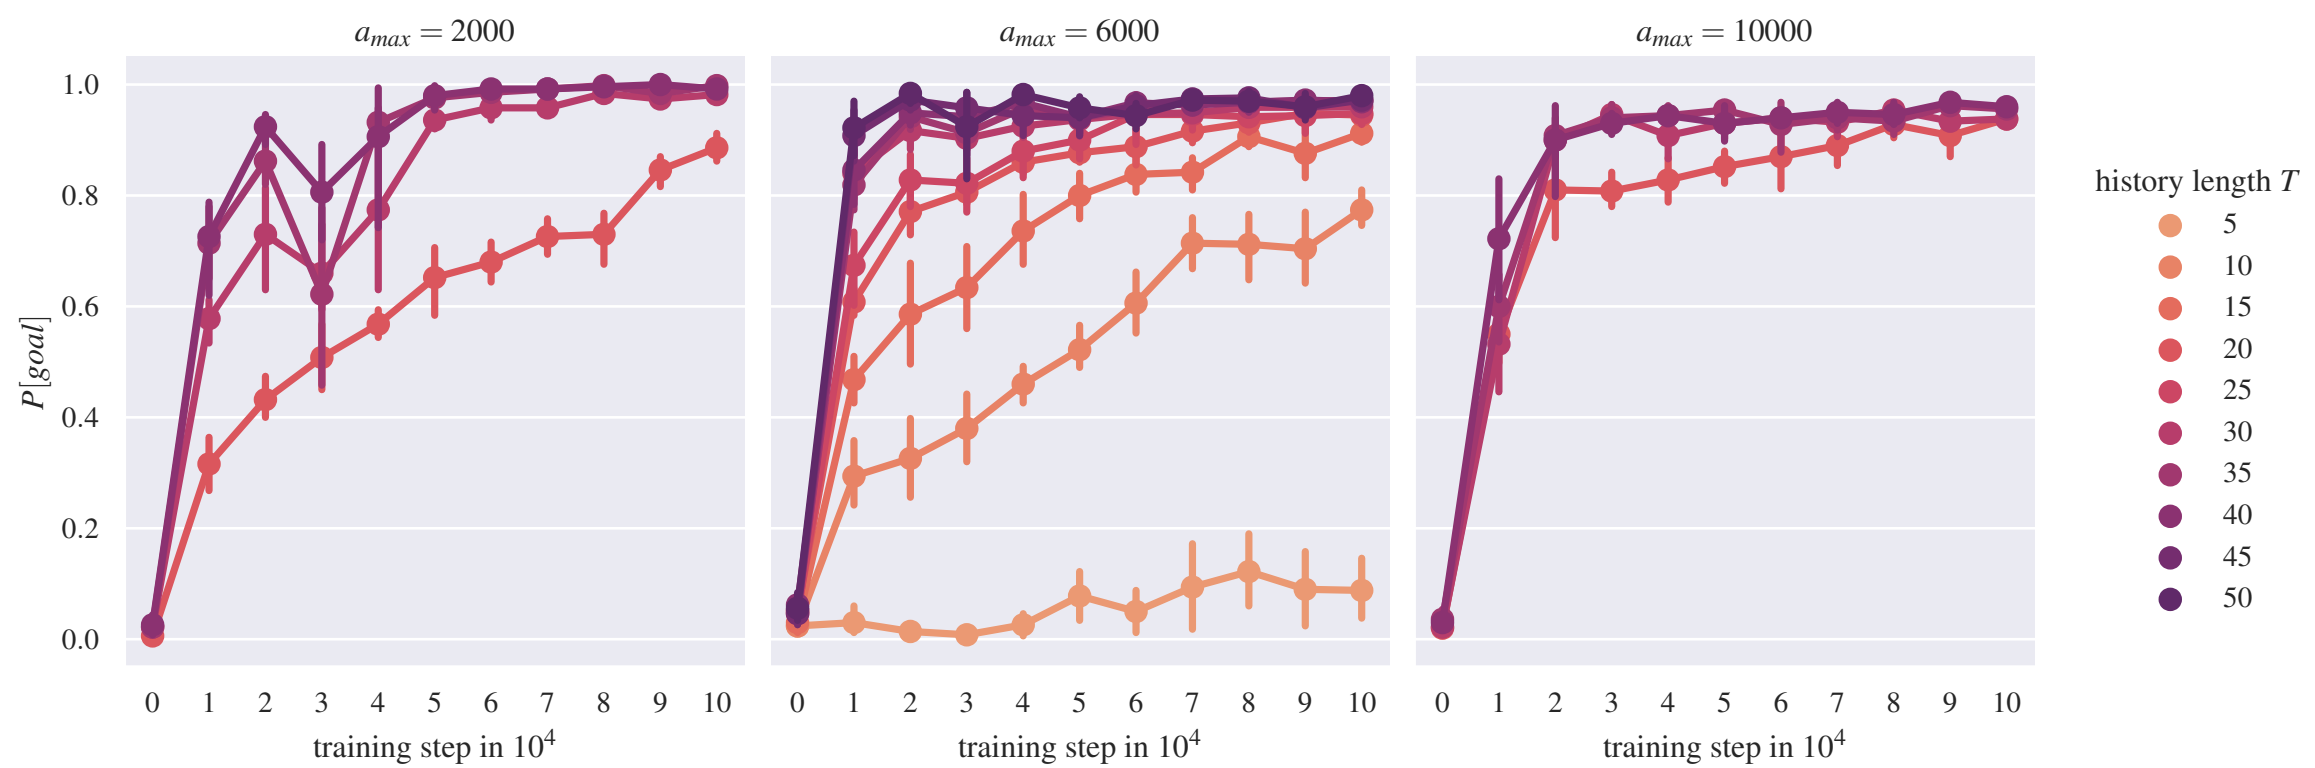

Supplement: supplementary_material [file attachment]

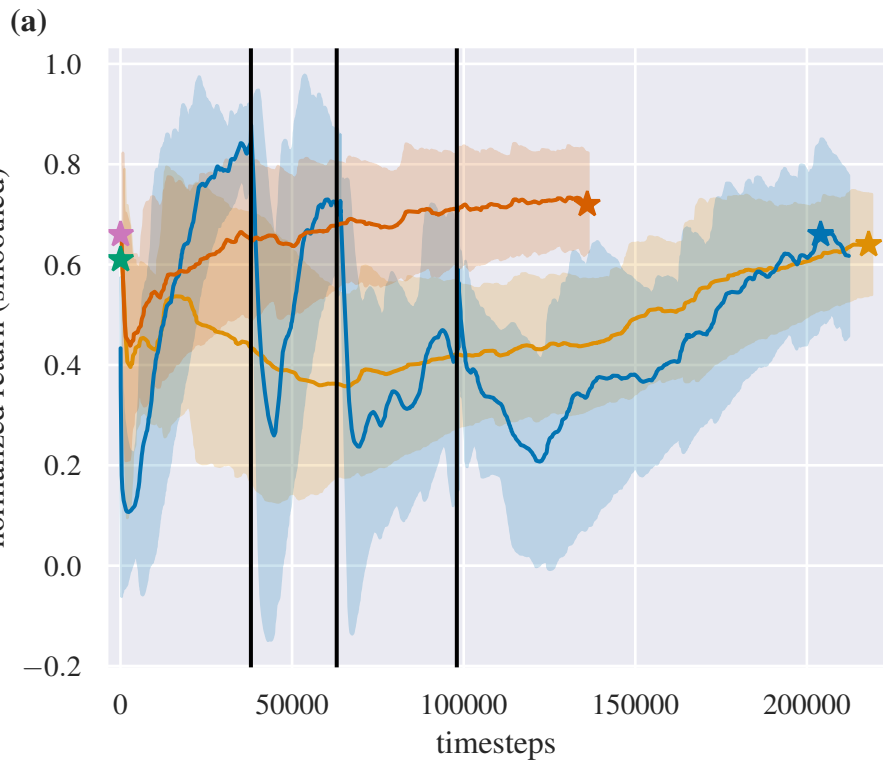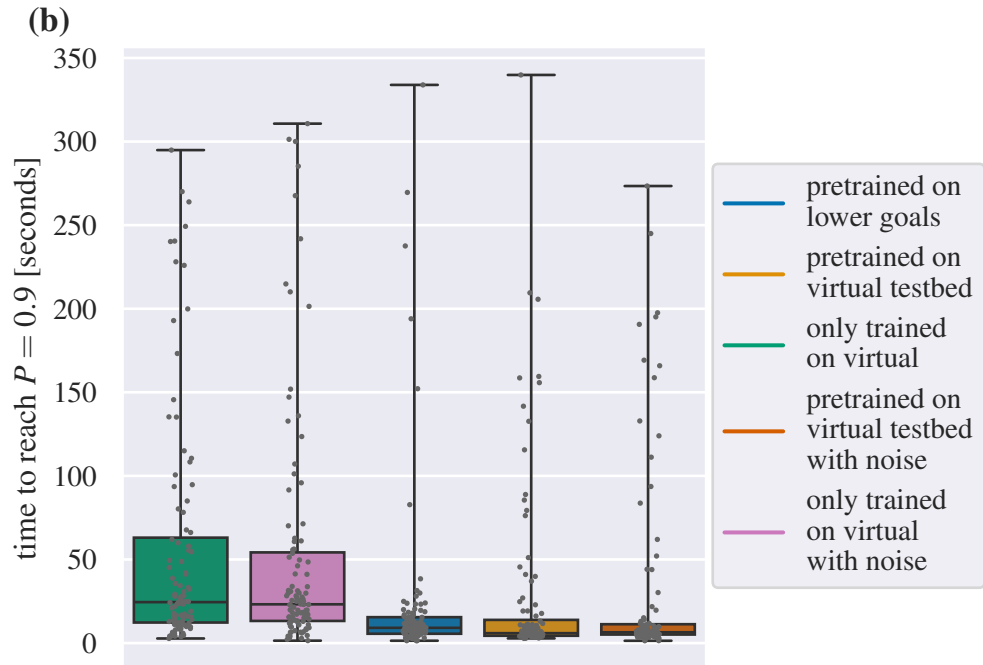

Supplement: supplementary_material [file attachment]

$A_f = 10$ 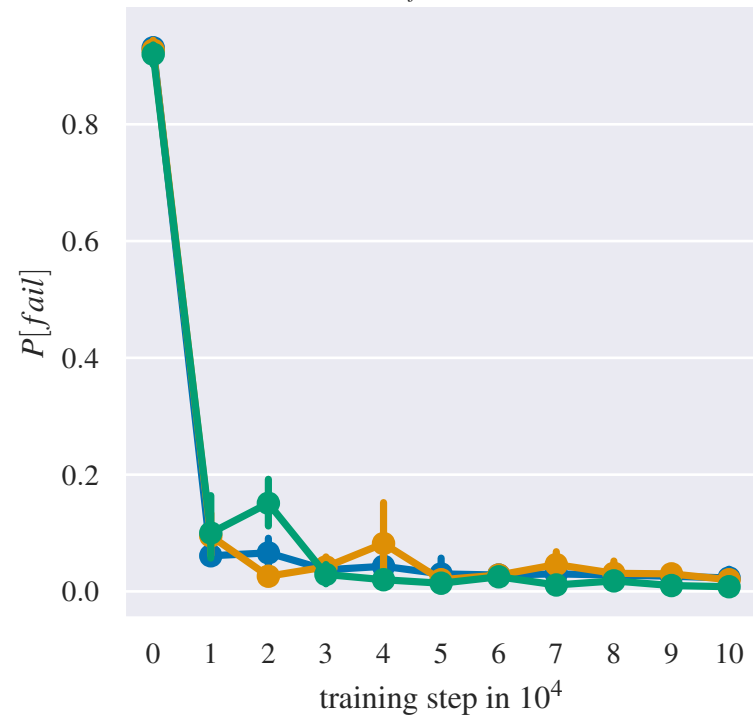 $A_f = 100$ 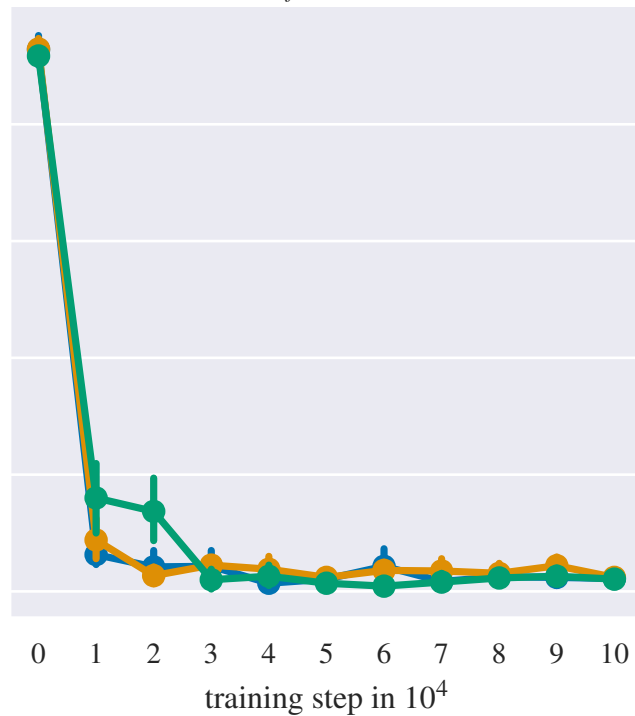 $A_f = 1000$ 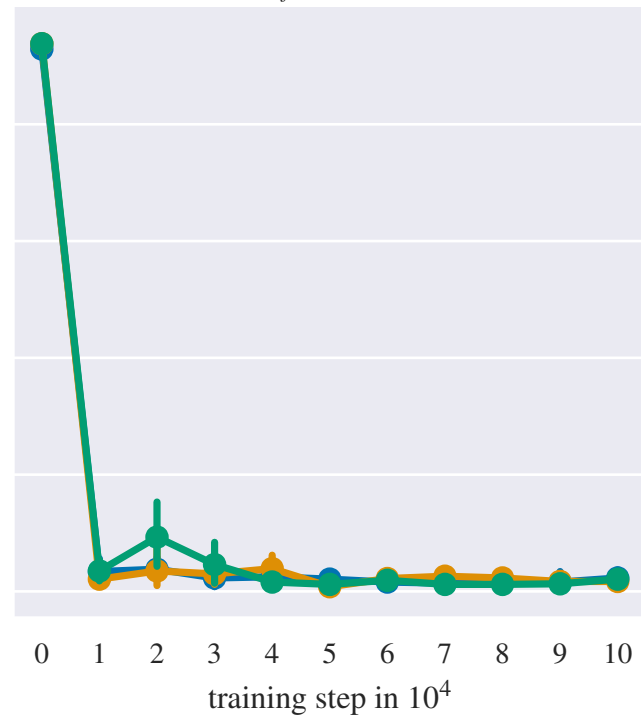

$A_g$

- 10
- 100
- 1000

Supplement: supplementary_material [file attachment]

(a)

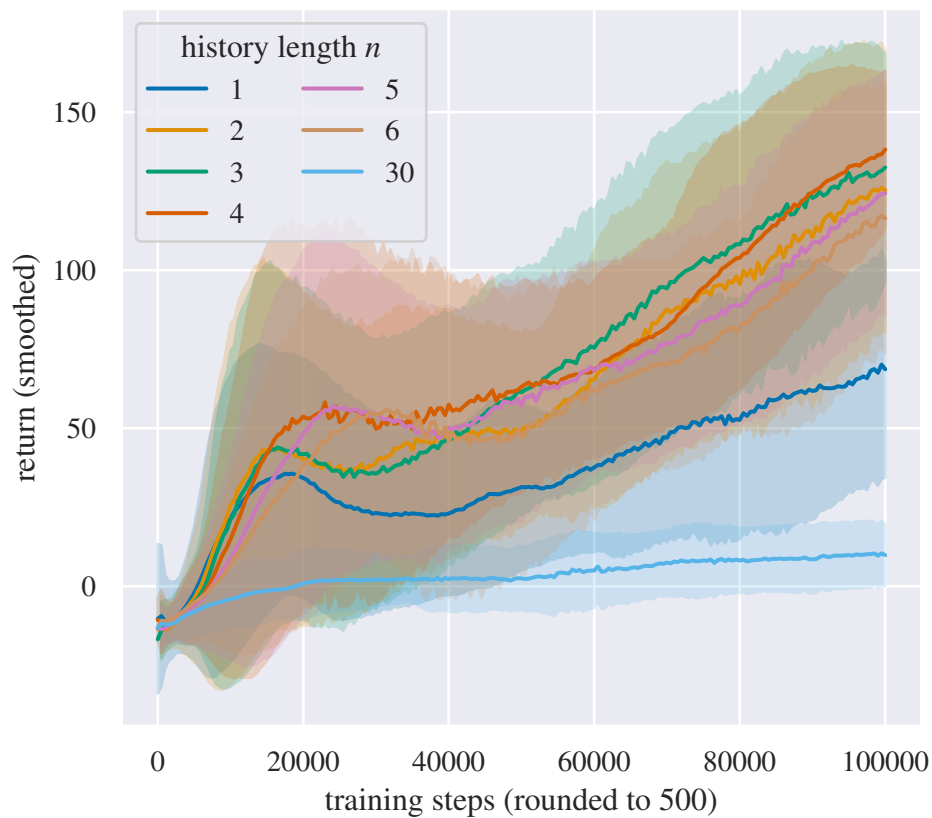

(b)

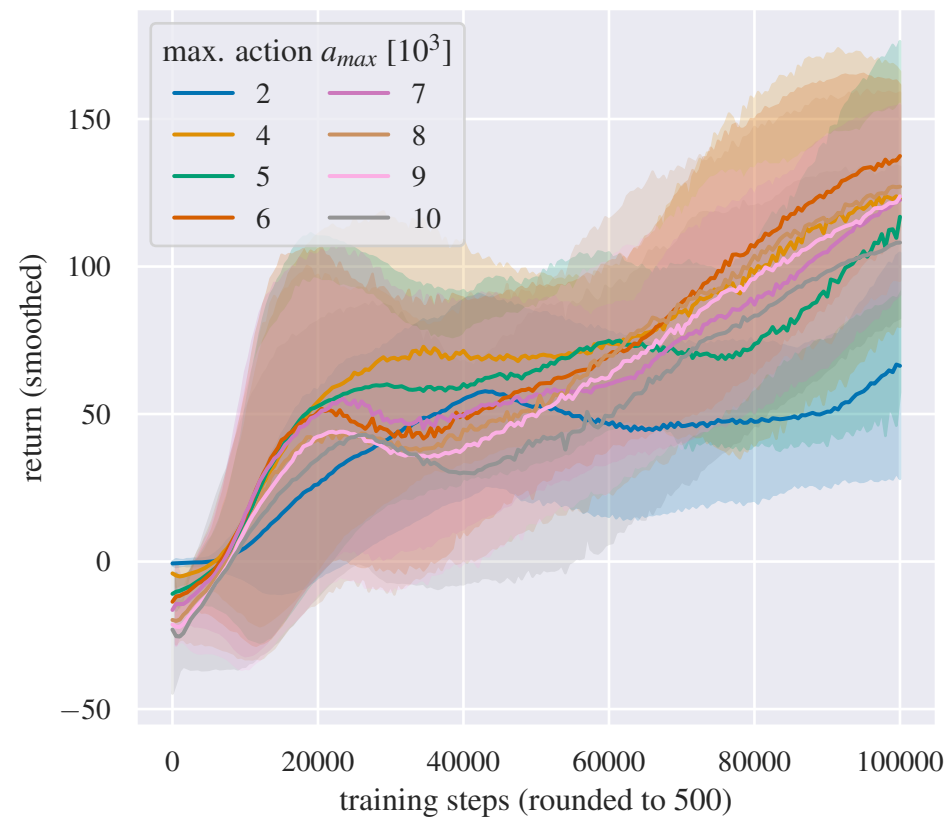

(c)

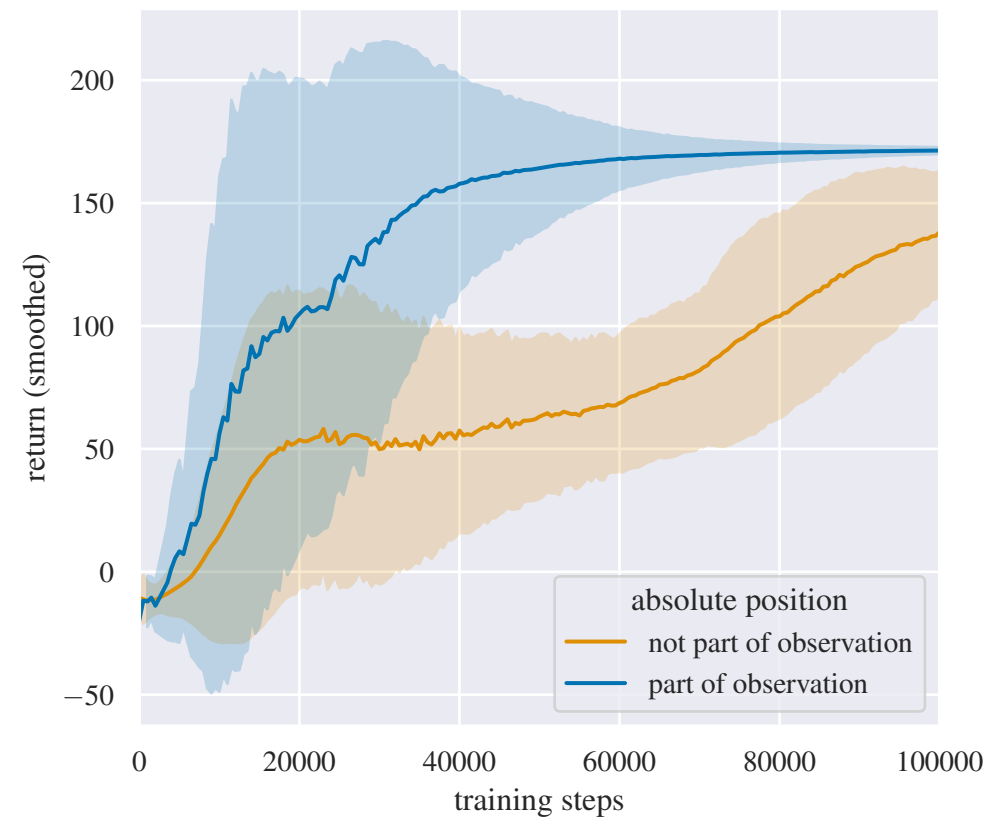

(d)

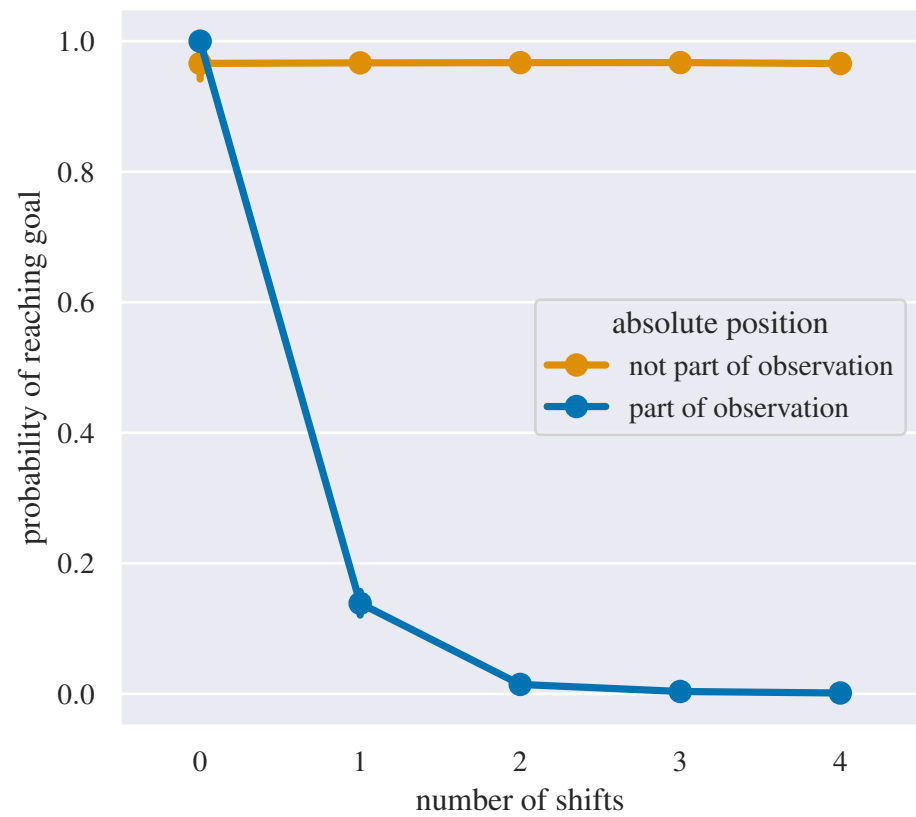

Supplement: supplementary_material [file attachment]

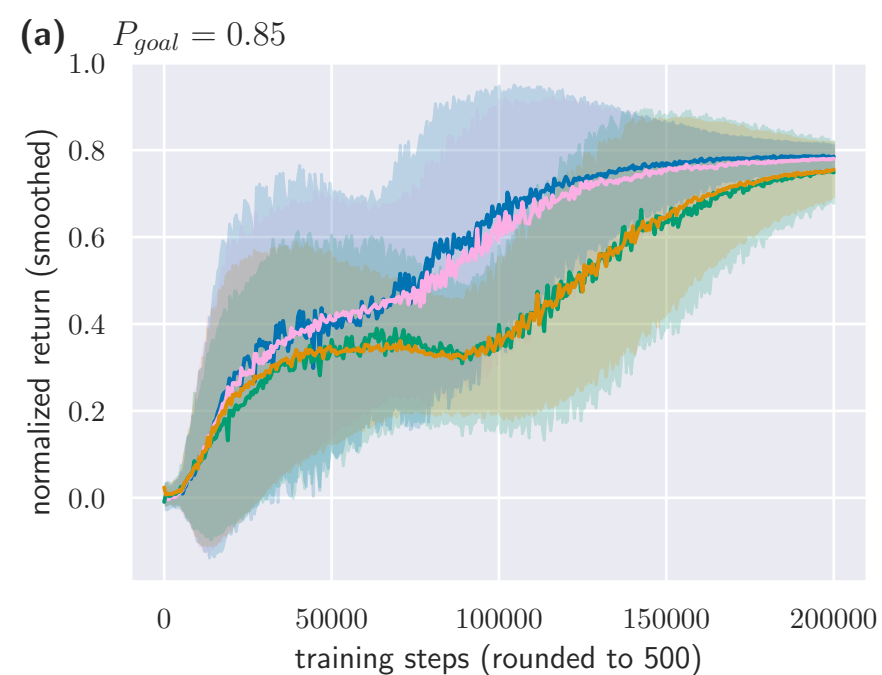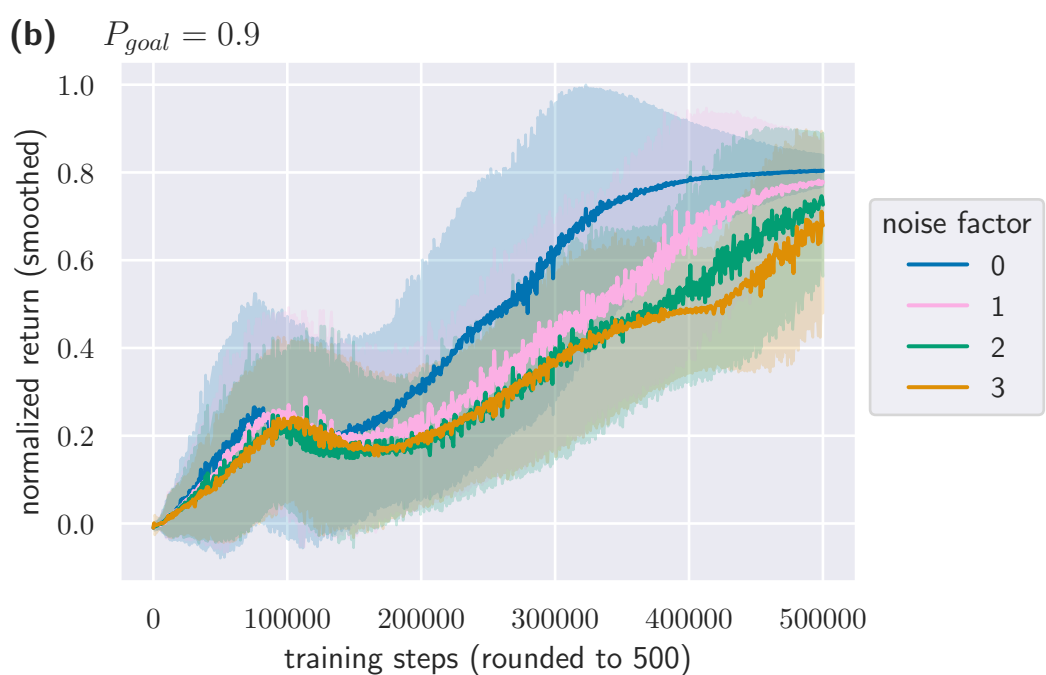

Supplement: supplementary_material [file attachment]
